## Challenges in Synthesising the Effects of Synchronous Remote-based Interventions on Suicidal Behaviours: A Systematic Review and Meta-Analysis

Laura Comendador<sup>1,2</sup>, María P. Jiménez-Villamizar<sup>3</sup>, Josep-Maria Losilla<sup>4</sup>, Juan P. Sanabria-Mazo<sup>3,5</sup>, Corel Mateo-Canedo<sup>3</sup>, Ana Isabel Cebrià<sup>2,6,7</sup>, Diego Palao<sup>1,2,7</sup>, Antoni Sanz<sup>3,8</sup>

<sup>1</sup>Department of Psychiatry and Forensic Medicine, Faculty of Medicine, Universitat Autònoma de Barcelona. 08193 Cerdanyola del Vallès, Spain.

<sup>2</sup>Department of Mental Health. e-MH-PEMN – 2021 SGR 01431. Parc Taulí Hospital Universitari. Institut d'Investigació i Innovació Parc Taulí (I3PT-CERCA), Unitat de Neurociències Traslacional I3PT-INc UAB, Institut de Neurociències. Universitat Autònoma de Barcelona. 08208 Sabadell, Spain.

<sup>3</sup>Department of Basic, Developmental and Educational Psychology, Faculty of Psychology, Universitat Autònoma de Barcelona. 08193 Cerdanyola del Vallès, Spain.

<sup>4</sup>Department of Psychobiology and Methodology of Health Sciences, Faculty of Psychology, Universitat Autònoma de Barcelona. 08193 Cerdanyola del Vallès, Spain.

<sup>5</sup>Teaching, Research & Innovation Unit, Parc Sanitari Sant Joan de Déu. 08830 Sant Boi de Llobregat, Spain.

<sup>6</sup>Department of Clinical and Health Psychology, Faculty of Psychology, Universitat Autònoma de Barcelona. 08193 Cerdanyola del Vallès, Spain.

<sup>7</sup>Centro de Investigación Biomédica en Red de Salud Mental (CIBERSAM), Instituto de Salud Carlos III. 28029 Madrid, Spain.

<sup>8</sup>Stress and Health Research Group (GIES). Universitat Autònoma de Barcelona. 08193 Cerdanyola del Vallès, Spain.

### Corresponding authors

Antoni Sanz, PhD

Department of Basics, Developmental and Educational Psychology, Faculty of Psychology, Universitat Autònoma de Barcelona.

Carrer de la Fortuna, s/n. Campus de Bellaterra, Universitat Autònoma de Barcelona. 08193 Cerdanyola del Vallès (Spain).

E-mail: antonio.sanz@uab.cat

Ana Isabel Cebrià, PhD

Department of Mental Health. e-MH-PEMN – 2021 SGR 01431. Parc Taulí Hospital Universitari. Institut d'Investigació i Innovació Parc Taulí (I3PT-CERCA), Unitat de Neurociències Traslacional I3PT-INc UAB, Institut de Neurociències. Universitat Autònoma de Barcelona. 08208 Sabadell, Spain.

Parc Taulí, 1. 08208 Sabadell, Barcelona (Spain).

E-mail: acebria@tauli.cat

### ABSTRACT

**Introduction** Suicide is one of the leading causes of preventable death worldwide. Evidence reported in the literature seems to support the impact of providing active contact for people that have attempted suicide. The current systematic review and meta-analysis aim to investigate the effects of suicide prevention strategies implemented through remote and synchronous technology-based interventions.

**Methods** The systematic review and meta-analysis followed the PRISMA 2020 guidelines. The searches were conducted in PubMed, PsycInfo, Scopus, and Web of Science. Screening, selection process, data extraction, and risk of bias (RoB) assessment have been performed independently by two reviewers. A systematic review and narrative synthesis of the data has been performed. Data on adherence to treatment and suicide-related factors to explain heterogeneity were extracted. A meta-analysis was conducted to determine effect sizes (Hedge's  $g$ ) for suicidal ideation, odds ratios (OR) and 95% confidence intervals (95% CI) for lethal and non-lethal suicide behaviours. Data were pooled using a random-effects model. Subgroup analyses were performed by classifying the studies according to the evaluation period.

**Results** A total of 26 publications were finally included. Synchronous remote-based interventions were effective in preventing repeated suicide attempts (OR = 0.75; 95% CI 0.62 – 0.90) and suicide deaths (Peto OR = 0.37; 95% CI 0.18 – 0.77); however, considerable heterogeneity was reported. The effects on suicidal ideation were not confirmed (Hedge's  $g$  = 0.23; 95% CI -1.54 – 1.07).

**Conclusions** The observed heterogeneity suggests that the effects should be considered under caution. Methodological and procedural guidelines are proposed to improve the quality of future research studies.

**Keywords** Suicide, Telemedicine, Preventive Medicine.

**NOTE:** This preprint reports new research that has not been certified by peer review and should not be used to guide clinical practice.

# 1 Challenges in Synthesising the Effects of Synchronous Remote-based Interventions on 2 Suicidal Behaviours: A Systematic Review and Meta-Analysis

## 3 ABSTRACT

4 **Introduction** Suicide is one of the leading causes of preventable death worldwide. Evidence  
5 reported in the literature seems to support the impact of providing active contact for people  
6 that have attempted suicide. The current systematic review and meta-analysis aim to investigate  
7 the effects of suicide prevention strategies implemented through remote and synchronous  
8 technology-based interventions.

9 **Methods** The systematic review and meta-analysis followed the PRISMA 2020 guidelines. The  
10 searches were conducted in PubMed, PsycInfo, Scopus, and Web of Science. Screening, selection  
11 process, data extraction, and risk of bias (RoB) assessment have been performed independently  
12 by two reviewers. A systematic review and narrative synthesis of the data has been performed.  
13 Data on adherence to treatment and suicide-related factors to explain heterogeneity were  
14 extracted. A meta-analysis was conducted to determine effect sizes (Hedge's  $g$ ) for suicidal  
15 ideation, odds ratios (OR) and 95% confidence intervals (95% CI) for lethal and non-lethal suicide  
16 behaviours. Data were pooled using a random-effects model. Subgroup analyses were  
17 performed by classifying the studies according to the evaluation period.

18 **Results** A total of 26 publications were finally included. Synchronous remote-based  
19 interventions were effective in preventing repeated suicide attempts (OR = 0.75; 95% CI 0.62 –  
20 0.90) and suicide deaths (Peto OR = 0.37; 95% CI 0.18 – 0.77); however, considerable  
21 heterogeneity was reported. The effects on suicidal ideation were not confirmed (Hedge's  $g$  =  
22 0.23; 95% CI -1.54 – 1.07).

23 **Conclusions** The observed heterogeneity suggests that the effects should be considered under  
24 caution. Methodological and procedural guidelines are proposed to improve the quality of  
25 future research studies.

26 **Keywords** Suicide, Telemedicine, Preventive Medicine.

## 27 INTRODUCTION

28 The World Health Organization (WHO) estimates that over 703,000 people die annually from  
29 suicide worldwide [1, 2]. Suicide is a complex behaviour with multiple etiological factors that has  
30 become a serious public health problem. Every suicide is a major grievous blow that affects  
31 families, communities and entire countries and has lasting effects on the people left behind [1].  
32 Suicide occurs across the lifespan; although, in 2019, it was the fourth leading cause of death  
33 among individuals aged 15-29 years worldwide [2, 3]. For each death by suicide, there are  
34 twenty suicide attempts [4], which is one of the major disease burden causes in the world [5, 6,  
35 7]. Moreover, a history of suicide attempts is considered a robust predictor of completed  
36 suicide, supporting prevention efforts during the acute period following an episode of suicidal  
37 behaviour [8, 9, 10, 11].

38 Suicide prevention is emerging as a priority for the public health system [12]. Increasing  
39 evidence in the literature suggests that post-discharge follow-up contacts can be an effective  
40 suicide prevention strategy [13-17]. Information and communication technology-based  
41 interventions (ICT) have created opportunities and challenges in prevention, research, and  
42 clinical practice. Brief Intervention and Contact (BIC), 24/7 hotlines, letter/postcard delivery, or  
43 telephone follow-up have been classified as active contact interventions to prevent repeat  
44 suicidal behaviour in patients admitted to an Emergency Department (ED) [18, 19]. There is a  
45 wide range of eHealth-based treatments that are commonly classified into two categories: real-  
46 time synchronous therapy – such as telephone contact or telepsychiatry via videoconferencing  
47 – or digital self-help programs without human guidance, often asynchronous [20, 21].

48 An essential component of the effects of suicide prevention interventions is adherence  
49 to treatment, a factor at the core of mental health care [22]. The evaluation of therapeutic  
50 adherence in clinical care is critically important since poor adherence results in adverse  
51 outcomes, such as relapses and hospitalizations, among people with mental health disorders  
52 worldwide [22, 23, 24]. The multivariate character of treatment adherence has been

53 emphasized in the literature as a facilitator for optimizing the benefits of all current therapies  
54 [22]. Accordingly, most post-discharge suicide prevention programmes reinforce contact with  
55 mental health professionals. Brief contact interventions have three rationales: first, allows for  
56 repeated suicide risk assessments; second, reduce feelings of social isolation and provide  
57 emotional support; third, improve adherence to treatment and reduce dropout from mental  
58 health care [25–28]. In recent decades, studies have been published with promising results  
59 implementing follow-up contact interventions for at-risk individuals as a suicide prevention  
60 strategy [29,30]. Along these lines, Milner *et al.* [31] propose that large-scale clinical trials would  
61 be appropriate to examine the cost-effectiveness and usefulness of implementing brief contact  
62 intervention programs and, at present, they are not recommending generalized clinical  
63 implementation. In 2016, Noh *et al.* [32] reviewed five randomized controlled trials (RCTs)  
64 comparing telephone-delivered interventions after suicide attempts with a control group. The  
65 results suggest that more intensive, structured, evidence-based telephone interventions led by  
66 mental health professionals should be developed. In a recent scoping review, Shin *et al.* [33]  
67 present several trends of the ICT-based intervention for suicide prevention applied in clinical  
68 settings and identify a need for future research to strengthen the evidence for improving  
69 implementation. Luxton *et al.* [34] suggest that repeated follow-up contacts appear to reduce  
70 suicidal behaviour, reporting in their systematic review four studies that showed mixed results  
71 with trends toward a preventive effect and two studies that showed no preventive effect.

72         The present review aims to systematically explore the evidence on remote suicide  
73 prevention strategies implemented through synchronous technology-based interventions (i.e.,  
74 via remote, interactive, real-time communication).

75

## 76 **METHODS**

77         The protocol of the systematic review and meta-analysis was registered in the  
78 Prospective International Registry of Systematic Reviews (PROSPERO), with the identification

79 number CRD42021275044. The review was developed according to the Preferred Reporting  
80 Items for Systematic reviews and Meta-Analyses (PRISMA) criteria [36]. The method is briefly  
81 described as follows; more information can be found in the published study protocol [35].

82

### 83 **Eligibility criteria**

#### 84 Types of studies

85 Randomized control trials (RCT), and non-randomized clinical trials (nRCT)– e.g., quasi-  
86 experimental trials.

87

#### 88 Types of participants

89 Adolescents over 12 years of age and adults with reported suicidal ideation or prior suicide  
90 attempts. Individuals with non-suicidal self-injury were excluded.

91

#### 92 Types of interventions

93 Secondary suicide prevention interventions delivered via synchronous distance  
94 communication technologies– i.e., telephone contact, 24-hour telephone hotlines,  
95 videoconferencing therapy, immediate text messaging, etc. Interventions based on  
96 asynchronous telecommunication devices were excluded.

97 All comparison groups identified– e.g., treatment as usual (visits to mental health  
98 services, pharmacotherapy, etc.)– were included. Non-reporting of an intervention group was a  
99 reason for exclusion.

100

#### 101 Types of outcomes measures

102 Suicidal behaviours– i.e., suicide ideation [37], suicide attempt [3], and suicide death  
103 [38]– were included.

104

## 105 **Data collection and analysis**

### 106 Information sources

107 Bibliographic searches were conducted in PubMed, PsycInfo, Scopus, and Web of  
108 Science for studies published before June 2023. ClinicalTrials.gov and Google Scholar were  
109 searched for gray literature and unpublished records. Reference lists of previous systematic  
110 reviews on the subject and references cited in eligible articles were consulted for data collection.

111

### 112 Search strategy

113 The general structure of the search syntax and the electronic search strategy developed  
114 for the PubMed database are available in Supplementary file 1 of the study protocol [35]. The  
115 search was unrestricted by year of publication, limited to English or Spanish, and developed with  
116 the collaboration of a health sciences librarian (GC), adhering to the Peer Review of Electronic  
117 Search Strategies (PRESS) [39].

118

### 119 Selection process

120 The results of the literature search were imported into Mendeley (version 1.19.8), and Rayyan  
121 Systems Inc [40]. Duplicate articles were removed automatically by Rayyan Systems Inc. and  
122 manually by the first reviewer (LC). After, two authors (LC and MPJ) blind-screened all articles  
123 based on titles, abstracts, and keywords. Then, two reviewers (LC and MPJ) independently  
124 evaluated the full-text articles according to the eligibility criteria. Discrepancies were resolved  
125 through discussion with a third author (AS) until reaching consensus.

126

### 127 Data collection process

128 Two authors (LC and MPJ) performed the data extraction independently, applying an *ad hoc*  
129 extraction form in Microsoft Excel (version 16.56).

130

131 Data items

132 Data were extracted on participants and intervention characteristics, outcomes related to  
133 suicidal behaviour for intervention and comparison groups– for all measures, time points,  
134 analyses, etc.–, and limitations. In addition, therapeutic adherence– specifically, the moderating  
135 effect of adherence on the efficacy of the intervention, the description of measures to maximize  
136 adherence to treatment, and predictor or moderator variables of adherence– were examined.

137

### 138 **Risk of bias (RoB) assessment**

139 Two reviewers (LC and MPJ) performed the RoB assessment independently, using the  
140 Revised Cochrane risk-of-bias tool for randomised trials (RoB 2.0) [41] and Risk-of-bias In Non-  
141 randomised Studies of Interventions (ROBINS-I) [42]. Disagreements were resolved by  
142 consensus with a third blinded reviewer (AS).

143

### 144 **Effect measures**

145 Systematically examined all types of psychometric measures used in the selected trials (e.g., risk  
146 ratio, mean difference) for the effects of each intervention group on suicidal ideation, repeated  
147 suicide attempts, and death by suicide.

148

### 149 **Synthesis methods**

150 A systematic review, meta-analysis, and narrative synthesis were performed. First, a systematic  
151 review was employed to collect and synthesize the empirical evidence that complied the  
152 eligibility criteria. Second, a meta-analysis using a random-effects model was calculated. To  
153 ensure that the combined numerical data from the different studies are comparable and can be  
154 adequately synthesized, subgroup analyses by sorting studies with the same evaluation  
155 measures time frame were performed for each outcome, and a narrative synthesis approach  
156 was adopted when a quantitative combination of the studies was not feasible.

157 Three types of meta-analyses were performed: a random-effects model with Hedges'  $g$   
158 [43] as the effect size measure and 95% confidence intervals (CI) was calculated for suicidal  
159 ideation. Effect sizes are considered small ( $g \geq 0.2$ ), medium ( $g \geq 0.5$ ) or large ( $g \geq 0.8$ ) [43]; a  
160 random-effects model with the effect estimates weighted by the inverse of the variance was  
161 calculated for suicide attempts. As proposed by Daly [44] and Zhang and Yu [45], the odds ratio  
162 (OR) and 95% CI were analysed; and a random-effects model with the effect estimates weighted  
163 by the Peto *et al.* method [46] was calculated for suicide deaths, since the observed frequencies  
164 are relatively low. Statistical heterogeneity was accounted for using  $I^2$  statistic. Heterogeneity  
165 was considered substantial if  $I^2$  was greater than 30%. All analyses were performed using the  
166 Meta-Essentials tool for Microsoft Excel (version 16.56) [47].

167 In trials with multiple assessment measurement periods, the trials were included as two  
168 separate studies; to avoid double counting, the control group data were shared between the  
169 two study comparisons [48].

170

## 171 RESULTS

### 172 Study selection

173 The initial search retrieved 2817 studies. After removing duplicates, 1742 articles were screened  
174 for title, abstract, and keywords. Of these, 159 studies were selected for full-text review. Finally,  
175 26 publications were included in the review [49 – 74]. The article selection process was  
176 described in a PRISMA flowchart [75] (Figure 1). Inter-rater agreement was calculated for initial  
177 screening using Delta ( $\delta = .91$ , CI 95%: 0.88 – 0.94) [76], and for eligibility and extraction process  
178 using Cohen's Kappa ( $\kappa = .82$ , CI 95%: 0.62 – 1.01;  $\kappa = .91$ ;  $\kappa = .98$ , CI 95%: 0.97 – 0.99,  
179 respectively) [77].



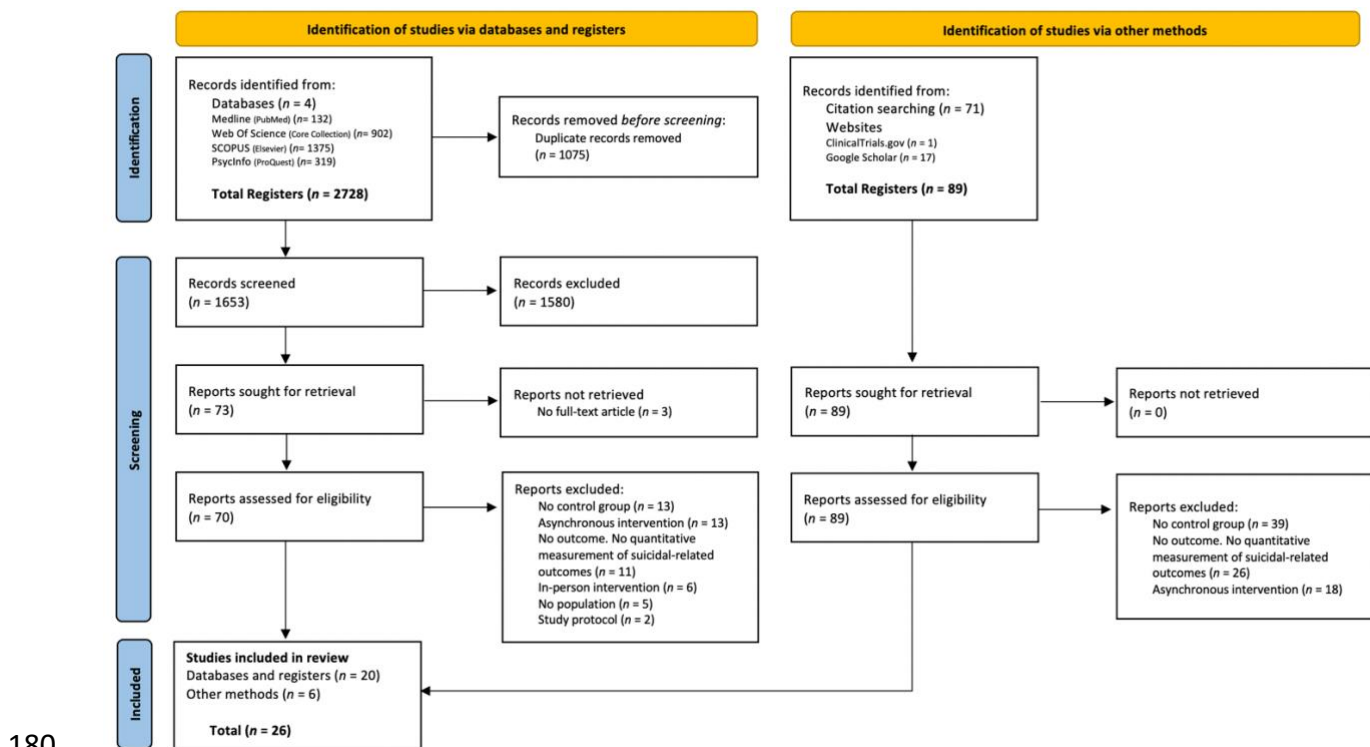

180

181 **Figure 1** PRISMA flow diagram for the systematic reviews which included searches of databases

182 and other sources.

183

184 Study characteristics

185 A descriptive summary of the characteristics of the included studies is presented in Table 1. The

186 studies were classified into two categories: 15 trials in the Active Contact and Follow-up group,

187 and 11 studies in the Multi-Component Interventions group (Supplemental File 1: Table S1). The

188 present review included 18 RCT (69.2%) [49, 50, 53 – 55, 57, 60, 62, 63, 65 – 68, 70 – 74]. The

189 sample size ranges from 10 to 3068 in the intervention group (IG) and from 10 to 3694 in the

190 control group (CG). The mean age ranged from 23 to 45 years in the IG and from 23 to 47 years

191 in the CG. The proportion of women in most of the studies was above 50% in both IG and CG,

192 except in three studies [55, 70, 73]. The participants in 23 studies were patients discharged from

193 ED for suicidal behaviour [49 – 53, 56 – 69, 71 – 74], the participants in the remaining studies

194 were callers to a national 24h-helpline service with moderate-to-high psychological distress [54],

195 or patients identified as being at risk of suicide [55, 70]. The eligible articles were from 11

196 countries: France [56, 63, 65, 69, 71, 72], Spain [51, 52, 58, 59, 61], United States of America  
197 (USA) [55, 64, 70, 73], Iran [60, 62, 66, 67], Brazil, India, Sri Lanka, Iran, China [50, 57], French  
198 Polynesia [49], Sweden [53], Australia [54], United Kingdom (UK) [68], and China [74].

199 As for outcomes variables, seven studies reported outcomes relating to suicidal ideation  
200 [53 – 55, 68, 70, 73, 74], 24 studies reported the proportion of participants who reattempted  
201 suicide [49 – 53, 55, 56, 58 – 74], and 12 reported the proportion of suicide deaths [49, 52, 55,  
202 57, 59 – 62, 64, 65, 71, 72]. There was a high heterogeneity in the diagnostic methods used to  
203 identify suicide behaviours: European Parasuicide Study Interview Schedule (EPSIS), Scale for  
204 Suicide Ideation (SSI), General Health Questionnaire (GHQ-28), Columbia Suicide Severity Rating  
205 Scale (CSSRS), Beck Scale for Suicidal Ideation (BSS), Suicide Attempt Self-Injury Count (SASI-  
206 Count), Beck's Suicide Intent Scale (SIS), Multisite Intervention Study on Suicidal Behaviours  
207 (SUPRE-MISS), forensic records of suicide deaths, data from electronic medical records, etc. The  
208 secondary outcomes assessed included: sociodemographic and clinical characteristics (e.g.,  
209 physical health status, clinical psychopathology, alcohol and drug use, psychosocial difficulties,  
210 quality of life, psychological distress, hopelessness, anxiety, depression, etc.) [49 – 74], method  
211 and characteristics of the index suicide attempt (psychiatric hospitalization, lethality of the  
212 suicide attempt, concomitant consumption of toxic substances before the suicide behaviour,  
213 personal and family history of previous suicidal behaviour, etc.) [50, 57, 60, 61, 63, 65 – 69, 71,  
214 72, 74], time to relapse [51, 52, 58], adherence to treatment as usual (TAU) [55, 58, 70, 73],  
215 social connectedness, support from a significant other, family, and friends [70], and self-  
216 injurious behaviours [73].

217 The interventions were categorised as (a) telephone follow-up intervention ( $n = 15$ ;  
218 57.7%) [51 – 53, 56, 58, 59, 61 – 63, 66, 67, 69, 71, 72, 74], (b) BIC ( $n = 5$ ; 19.2%) [49, 50, 57, 60,  
219 70], (c) 24-hour call-in services ( $n = 1$ ; 3.8%) [54], (d) instant text messages ( $n = 1$ ; 3.8%) [55], (e)  
220 Emergency Department Safety Assessment and Follow-up Evaluation (ED-SAFE intervention;  $n$   
221 = 1; 3.8%) [64], (f) postal cards, 24-hour telephone, and telephone follow-up ( $n = 1$ ; 3.8%) [65],

222 (g) Safety Planning and telephone follow-up intervention (SAFETEL intervention;  $n = 1$ ; 3.8%)  
 223 [68], and (h) Dialectical Behaviour Therapy Skills-Based Intervention (DBT-BSI) and telephone  
 224 follow-up ( $n = 1$ ; 3.8%) [73]. On the other side, the control group in most studies was TAU ( $n =$   
 225 24; 92.3%) [49 – 67, 68 – 72], except for two studies which were an active control group:  
 226 relaxation training condition [73] and cognitive therapy group [74]. Most interventions were  
 227 performed by nurses ( $n = 7$ ; 26.9%) [51, 52, 53, 56, 58, 59, 61], psychologists ( $n = 6$ ; 23.1%) [55,  
 228 62, 63, 68, 70, 72], psychiatrists ( $n = 5$ ; 19.2%) [65, 66, 67, 69, 71], physicians ( $n = 1$ ; 3.8%) [64],  
 229 and by a combination of health professionals– i.e., medical doctor, psychiatric nurse,  
 230 psychologist, or social work, in some cases ( $n = 4$ ; 15.4%) [49, 50, 57, 60]– although, few  
 231 interventions were undertaken by non-health professionals ( $n = 2$ ; 7.7%) [54, 74] or not reported  
 232 ( $n = 1$ ; 3.8%) [73]. The onset of the intervention– i.e., initial contact– could be categorised in a  
 233 time interval of days ( $n = 3$ ; 11.5%) [55, 65, 68], weeks ( $n = 19$ ; 73.1%) [49 – 52, 54, 56 – 63, 66,  
 234 67, 69, 72 – 74], months ( $n = 2$ ; 7.7%) [53, 71], or not reported ( $n = 2$ ; 7.7%) [64, 70]. The total  
 235 number of contacts ranged from 1 [63, 71, 72] to 14 [62], with a minimum duration of 5 minutes  
 236 [51, 52, 57] and a maximum of 40 minutes [74]. In addition, the follow-up period ranged from 2  
 237 months [56] to 5 years [52], with 12 months being the most prevalent research period range ( $n$   
 238 = 10; 38.5%) [51, 53, 54, 55, 58, 59, 61, 62, 64, 65], reflecting that suicide risk is high within the  
 239 first year of a suicide attempt [32].

240

241 **Table 1**

242 Overview of participants, interventions, comparisons, outcomes, and study design (PICOS) for  
 243 studies evaluating suicide ideation, attempted suicide, and suicide death.

| Study (authors, date of publication, country)         | Study design | Setting, sample size (N)  | Details of participants                                                          | Intervention (n) and comparison (n)                                                                                                                                                           | Duration of follow-up | Outcome measure (Instrument)                                                     |
|-------------------------------------------------------|--------------|---------------------------|----------------------------------------------------------------------------------|-----------------------------------------------------------------------------------------------------------------------------------------------------------------------------------------------|-----------------------|----------------------------------------------------------------------------------|
| Amadéo <i>et al.</i> , 2015 [49]<br>French Polynesia  | RCT          | Psychiatric ED<br>N = 190 | Patients with suicidal behaviour; mean age IG 33, mean age CG 31.48; 64.2% women | BIC ( $n = 90$ ) vs. TAU ( $n = 100$ )<br>1h psycho-educational session combined with telephone contacts at 1, 2, 4, 7, 11 weeks, 4, 6, 12, and 18 months by psychologists and psychiatrists. | 18 months             | Suicide attempt (EPSIS) [78], Suicide death (Forensic records of suicide deaths) |
| Bertolote <i>et al.</i> , 2010 [50]<br>Brazil, India, | RCT          | ED<br>N = 1867            | Patients with suicide attempt; mean age IG                                       | BIC ( $n = 922$ ) vs. TAU ( $n = 945$ )<br>1h brief educational intervention combined with telephone contacts or                                                                              | 18 months             | Suicide attempt (EPSIS) [78]                                                     |

|                                                                                |                                |                                                                    |                                                                                                                                            |                                                                                                                                                                                                                                                                                                                                                                                              |           |                                                                                                        |  |
|--------------------------------------------------------------------------------|--------------------------------|--------------------------------------------------------------------|--------------------------------------------------------------------------------------------------------------------------------------------|----------------------------------------------------------------------------------------------------------------------------------------------------------------------------------------------------------------------------------------------------------------------------------------------------------------------------------------------------------------------------------------------|-----------|--------------------------------------------------------------------------------------------------------|--|
| Sri Lanka, Iran, China                                                         |                                |                                                                    | 26.3, mean age CG 25.5; 58.2% women                                                                                                        | visits at 1, 2, 4, 7, 11 weeks, 4, 6, 12, 18 months by medical doctor, psychiatric nurse, psychologist, or social work.                                                                                                                                                                                                                                                                      |           |                                                                                                        |  |
| Cebrià <i>et al.</i> , 2013 [51]<br>Spain                                      | nRCT; Case-Control Study       | 2 Hospital ED<br>N = 514                                           | Patients discharged from ED after suicide attempt; mean age IG 41.92 (SD = 14.7), mean age CG 40.73 (SD = 15.1); 66.5% women               | Telephone follow-up (n = 296) vs. TAU (n = 218)<br>Telephone contacts (5-10 min.) at 1 week, 1, 3, 6, 9 and 12 months by psychiatric nurse.                                                                                                                                                                                                                                                  | 12 months | Suicide attempt (Interview + Data from electronic medical records)                                     |  |
| Cebrià <i>et al.</i> , 2015 [52]<br>Spain                                      | nRCT                           | 2 Hospital ED<br>N = 485                                           | Patients discharged from ED after suicide attempt; mean age IG 38.78 (SD = 14.8), mean age CG 41.92 (SD = 14.7); 64.5% women               | Telephone follow-up (n = 287) vs. TAU (n = 198)<br>Telephone contacts (5-10 min.) at 1 week, 1, 3, 6, 9 and 12 months by psychiatric nurse.                                                                                                                                                                                                                                                  | 60 months | Suicide attempt, Suicide death (Interview + Data from electronic medical records)                      |  |
| Cedereke <i>et al.</i> , 2002 [53]<br>Sweden                                   | RCT                            | University hospital, Medical Emergency Inpatient Unit<br>N = 216   | Patients treated after a suicide attempt; mean age IG 40 (SD = 17.1), mean age CG 42 (SD = 17.1); 66% women                                | Telephone follow-up (n = 107) vs. TAU (n = 109)<br>Telephone contacts (20-25 min.) at 4 and 8 months after a suicide attempt, by a psychiatric nurse or social counsellor.                                                                                                                                                                                                                   | 12 months | Suicidal ideation (SSI) [79], Suicide attempt (Semi-structured interview)                              |  |
| Christensen <i>et al.</i> , 2013 [54]<br>Australia                             | RCT                            | Lifeline, Australia's 24h telephone counselling service<br>N = 155 | Callers to a national 24h-helpline service with moderate-to-high psychological distress; mean age 41.49 (SD = 12.35); 81.9% women          | Web-based CBT (n = 38) vs. Web-based CBT + telephone follow-up (n = 45) vs. telephone follow-up (n = 37) vs. TAU (n = 35)<br>CBT delivered across five modules. Telephone contacts (10 min.), weekly, by a Lifeline telephone counsellor.                                                                                                                                                    | 12 months | Suicidal ideation (GHQ-28) [80]                                                                        |  |
| Comtois <i>et al.</i> , 2019 [55]<br>USA                                       | RCT                            | 3 military installations<br>N = 657                                | Soldiers and Marines identified as being at risk of suicide; mean age IG 25.6 (SD = 6.3), mean age CG 24.8 (SD = 5.8); 17.9% women         | Caring contacts (n = 329) vs. TAU (n = 328)<br>Text messages delivered on day 1, at week 1, at months 1, 2, 3, 4, 6, 8, 10, and 12, and on participants' birthdays, by mental health clinicians. Text message replies from participants were monitored 24 hours a day. Replies indicating suicide risk or distress were handled by a few text messages exchanged or a single telephone call. | 12 months | Suicidal ideation (SSI) [79], Suicide attempt (Interview + SASI-Count) [81], Suicide death (Interview) |  |
| Exbrayat <i>et al.</i> , 2017 [56]<br>France                                   | nRCT                           | Department of Emergency Psychiatry<br>N = 827                      | Patients admitted to the ED for suicide attempt; mean age IG 40.2 (SD = 15.3), mean age CG 39.7 (SD = 15.1); 69.5% women                   | Telephone follow-up (n = 436) vs. TAU (n = 387)<br>Telephone contacts at 8, 30, 60 days after suicide attempt by nurses.                                                                                                                                                                                                                                                                     | 2 months  | Suicide attempt (Data from electronic medical records)                                                 |  |
| Fleischmann <i>et al.</i> , 2008 [57]<br>Brazil, India, Sri Lanka, Iran, China | RCT                            | ED<br>N = 1867                                                     | Patients admitted to the ED for suicide attempt; mean age IG 23, mean age CG 23; 58.2% women                                               | BIC (n = 922) vs. TAU (n = 945)<br>1h brief educational intervention combined with telephone contacts (5 min.) or visits at 1, 2, 4, 7, 11 weeks, 4, 6, 12, 18 months by medical doctor, psychiatric nurse, psychologist, or social work.                                                                                                                                                    | 18 months | Suicide death (EPSIS) [78]                                                                             |  |
| Gabilondo <i>et al.</i> , 2019 [58]<br>Spain                                   | nRCT; prospective cohort study | 3 General Hospitals<br>N = 586                                     | Patients discharged from a General Hospital after a suicide attempt; mean age IG 41.2 (SD = 13.6), mean age CG 45.2 (SD = 16); 58.5% women | Telephone follow-up (n = 123) vs. TAU (n = 463)<br>6 months telephone contacts (10-15 min.) after 1, 2 weeks, 1, 3, 6 months by general nurses.                                                                                                                                                                                                                                              | 12 months | Suicide attempt (Data from electronic medical records)                                                 |  |
| Gofí-Sarriés <i>et al.</i> , 2022 [59]<br>Spain                                | nRCT; pre-post study           | 2 Psychiatric Units<br>N = 191                                     | Patients admitted to the ED after attempted suicide; mean age IG 44.96 (SD = 15.21), mean age CG 46.91 (SD = 15.84); 52.9% women           | Telephone follow-up (n = 101) vs. TAU (n = 90)<br>Telephone contacts (15-20 min.) the day after discharge, at 15 days, and at 2, 4, 8 and 12 months by specialist nurse.                                                                                                                                                                                                                     | 12 months | Suicide attempts, Suicide death (Interview)                                                            |  |
| Hassanzadeh <i>et al.</i> , 2010 [60]<br>Iran                                  | RCT                            | 5 General Hospitals ED<br>N = 632                                  | Patients with suicide attempt; mean age IG 24 (SD = 8.3), mean age CG 25 (SD = 9.7); 62% women                                             | BIC (n = 319) vs. TAU (n = 310)<br>1-hour psycho-educational session combined with telephone contacts at 1, 2, 4, 7, 11 weeks, 4, and 6 months by psychologists, nurses, consultants, and psychiatric residents.                                                                                                                                                                             | 6 months  | Suicide attempts, Suicide death (SUPRE-MISS) [82]                                                      |  |

|                                              |                      |                                                                             |                                                                                                                                                                                                                                                         |                                                                                                                                                                                                                                                                                                                                                                                        |           |                                                                       |
|----------------------------------------------|----------------------|-----------------------------------------------------------------------------|---------------------------------------------------------------------------------------------------------------------------------------------------------------------------------------------------------------------------------------------------------|----------------------------------------------------------------------------------------------------------------------------------------------------------------------------------------------------------------------------------------------------------------------------------------------------------------------------------------------------------------------------------------|-----------|-----------------------------------------------------------------------|
| López-Goñi & Goñi-Sarriés 2021 [61]<br>Spain | nRCT; pre-post study | Psychiatric ED<br>N = 410                                                   | Patients discharged from the ED for a suicide attempt; mean age IG 41.7 (SD = 14.3), mean age CG 44.6 (SD = 14.3); 63.7% women                                                                                                                          | Telephone follow-up (n = 203) vs. TAU (n = 207)<br>Telephone follow-up at 15 days, 2, 4, 8, and 12 months by mental health nurse.                                                                                                                                                                                                                                                      | 12 months | Suicide attempt, Suicide death (Data from electronic medical records) |
| Malakouti <i>et al.</i> , 2022 [62]<br>Iran  | RCT                  | Hospital ED<br>N = 305                                                      | Patients admitted to the ED after attempted suicide; IG Age < 27 years 58.2%, age 28-37 years 29.4%, age 38-47 years 11.1%, age > 48 years 1.3%; CG Age < 27 years 60.5%, age 28-37 years 30.9%, age 38-47 years 7.2%, age > 48 years 1.3%; 66.9% women | Telephone contact program (n = 153) vs. TAU (n = 152)<br>Telephone contacts calls (15-20 min.) at 1, 2, and 4 weeks, and monthly for up to 12 months by clinical psychologists with master's degree.                                                                                                                                                                                   | 12 months | Suicide attempts, Suicide death (SUPRE-MISS) [82]                     |
| Messiah <i>et al.</i> , 2019 [63]<br>France  | RCT                  | 23 Hospital ED and psychiatric crisis centres<br>N = 1040                   | Patients discharged from the ED for a suicide attempt; mean age not reported: IG Age 18-35 years 42.9%, age 36-55 years 46.1%, age above 55 years 11.0%; CG Age 18-35 years 43.1%, age 36-55 years 45.9%, age above 55 years 11.0%; 65.9% women         | AlgoS algorithm: Telephone follow-up for multi-attempters (n = 317) or crisis card for first attempters (n = 203) vs. TAU (n = 520)<br>Telephone follow-up between the 10 <sup>th</sup> and 21 <sup>st</sup> by psychologist.<br>The patient could not be contacted after 3 attempts, on 3 different days, at 3 different times of day: post-cards were sent at 2, 3, 4, and 5 months. | 14 months | Suicide attempt (Semi-structured interview)                           |
| Miller <i>et al.</i> , 2017 [64]<br>USA      | nRCT; pre-post study | 8 Hospital ED<br>N = 1376                                                   | Patients with suicide attempt or ideation presented to hospital ED; mean age IG 36 (SD = 9.5), mean age CG 37 (SD = 10.5); 56% women                                                                                                                    | Universal screening and ED-SAFE intervention (n = 502) vs. Universal screening (n = 377) vs. TAU (n = 497)<br>Risk screening by the ED physician, discharge resource and 7 post-ED telephone calls (10-20 min.).                                                                                                                                                                       | 12 months | Suicide attempt, Suicide death (CSSRS) [83]                           |
| Mouaffak <i>et al.</i> , 2015 [65]<br>France | RCT                  | Psychiatric ED and Psychiatric Department of University Hospital<br>N = 320 | Patients admitted to the ED for suicide attempt; mean age IG 39 (SD = 13), mean age CG 38.6 (SD = 13.3); 70% women                                                                                                                                      | Postal cards, 24-hour telephone and telephone follow-up (n = 160) vs. TAU (n = 160)<br>Postal cards, few days, 1, 6, and 11 months providing 24-hour crisis telephone consultation with a senior psychiatrist, and telephone calls at 2 weeks, 1, and 3 months post discharge.                                                                                                         | 12 months | Suicide attempt (SIS) [84], Suicide death (Semi-structured interview) |
| Mousavi <i>et al.</i> , 2014 [66]<br>Iran    | RCT                  | Hospital ED<br>N = 139                                                      | Patients admitted to the ED for suicide attempt in 2010-2011; mean age not reported: IG Age 15-25 years 65.2%, age 26-35 years 21.7%, age above 35 years 13%; CG Age 15-25 years 51.4%, age 26-35 years 31.4%, age above 35 years 17.1%; 63.3% women    | Telephone follow-up (n = 69) vs. TAU (n = 70)<br>Telephone contacts (30 min.) at 2, 4 weeks, 2, 3, 4, 5, and 6 months by psychiatry.                                                                                                                                                                                                                                                   | 6 months  | Suicide attempt ( <i>ad hoc</i> questionnaire)                        |
| Mousavi <i>et al.</i> , 2016 [67]<br>Iran    | RCT                  | Hospital ED<br>N = 55                                                       | Patients admitted to the ED for suicide attempt; mean age IG 27.07 (SD = 7.79), mean age CG 29.69 (SD = 7.73); 87.3% women                                                                                                                              | Telephone follow-up (n = 29) vs. face-to-face (n = 26)<br>Telephone contacts (20 min.) at 2, 4 weeks, 2, 3, 4, 5, 6 and 8 months by an assistant of psychiatry.                                                                                                                                                                                                                        | 8 months  | Suicide attempt (Interview)                                           |
| O'Connor <i>et al.</i> , 2022 [68]<br>UK     | RCT                  | 4 general hospitals<br>N = 120                                              | Patients with a history of a suicide attempt; mean age IG 36.1 (SD = 16.1), mean age CG 37.0 (SD = 14.8); 62.5% women                                                                                                                                   | SAFETEL intervention (n = 80) vs. TAU (n = 40).<br>Safety planning intervention session and 5 optional telephone calls at 72h of patient discharge from hospital and weekly thereafter depending on participants' availability by clinical psychologists.                                                                                                                              | 6 months  | Suicide Ideation, Suicide attempt (CSSRS) [83]                        |

|                                                  |                                |                                                |            |                                                                                                                                                                      |                                                                                                                                                                                                                                                                                                                                                                                                                                          |           |                                                                                                     |
|--------------------------------------------------|--------------------------------|------------------------------------------------|------------|----------------------------------------------------------------------------------------------------------------------------------------------------------------------|------------------------------------------------------------------------------------------------------------------------------------------------------------------------------------------------------------------------------------------------------------------------------------------------------------------------------------------------------------------------------------------------------------------------------------------|-----------|-----------------------------------------------------------------------------------------------------|
| Plancke <i>et al.</i> , 2020 [69]<br>France      | nRCT;<br>Longitudinal<br>Study | Hospital ED<br><i>N</i> = 6762                 |            | Patients discharged from the hospital suicide attempt; mean age IG 37.9, mean age CG 39.4; 61.4% women                                                               | Telephone follow-up ( <i>n</i> = 3068) vs. TAU ( <i>n</i> = 3694)<br>Telephone contacts at 10, 21 days and 6 months by psychiatrists.<br>The patient could not be reached by telephone: post-cards were sent at 2, 3, 4, and 5 months.                                                                                                                                                                                                   | 6 months  | Suicide attempt (Interview)                                                                         |
| Riblet <i>et al.</i> , 2022 [70]<br>USA          | RCT                            | Veterans Center<br><i>N</i> = 20               | Medical    | Patients at risk for suicide; mean age IG 54.9 ( <i>SD</i> = 17.1), mean age CG 48.1 ( <i>SD</i> = 17.6); 35% women                                                  | BIC ( <i>n</i> = 10) vs. TAU ( <i>n</i> = 10)<br>6 contacts by phone or video over 3 months, educational materials mailed out to the patient, and 1-hour educational intervention on suicide prevention either over phone or video by clinical psychologist.                                                                                                                                                                             | 3 months  | Suicide Ideation (BSS [85] + Data from the electronic medical record), Suicide attempt (CSSRS) [83] |
| Vaiva <i>et al.</i> , 2006 [71]<br>France        | RCT                            | 13 ED<br><i>N</i> = 605                        |            | Patients discharged from an ED after attempted suicide by deliberate self-poisoning; mean age IG 37 ( <i>SD</i> = 12), mean age CG 35 ( <i>SD</i> = 11); 72.9% women | Telephone contact 1 month ( <i>n</i> = 147) or 3 months ( <i>n</i> = 146) vs. TAU ( <i>n</i> = 312).<br>Telephone contact (20-25 min.) at 1 or 3 months after discharge from an ED for attempted suicide by psychiatrists.                                                                                                                                                                                                               | 13 months | Suicide attempts, Suicide death (Data from the electronic medical record)                           |
| Vaiva <i>et al.</i> , 2018 [72]<br>France        | RCT                            | 23 ED and psychiatry centers<br><i>N</i> = 987 | and crisis | Patients discharged from the ED for a suicide attempt; mean age IG 38.4 ( <i>SD</i> = 13.4), mean age CG 38.1 ( <i>SD</i> = 13.1); 63.4% women                       | AlgoS algorithm ( <i>n</i> = 493) vs. TAU ( <i>n</i> = 494)<br>Telephone contacts between the 10th and 21st day after suicide attempt by psychologist.<br>The patient could not be contacted after 3 attempts, on 3 different days, at 3 different times of day, or decline follow-up care from other services, or identified being under stress/experiencing a suicidal crisis: programmed mailing post-cards at months 2, 3, 4, and 5. | 13 months | Suicide attempts, Suicide death (Interview)                                                         |
| Ward-Ciesielski <i>et al.</i> , 2017 [73]<br>USA | RCT                            | University Outpatient Clinic<br><i>N</i> = 93  |            | Participants with suicidal ideation; mean age IG 38.6 ( <i>SD</i> = 15.0), mean age CG 41.8 ( <i>SD</i> = 15.3); 37% women                                           | DBT-BSI and telephone follow-up ( <i>n</i> = 46) vs. RT control condition ( <i>n</i> = 47)<br>Single-session DBT-BSI, presenting pre-selected skills (mindfulness, opposite-to-emotion action, distraction, and changing your body chemistry) and 3 months telephone contact (30-45 min.) at 1, 4, and 12 weeks.                                                                                                                         | 3 months  | Suicidal ideation (SSI) [79], Suicide attempts (Interview)                                          |
| Wei <i>et al.</i> , 2013 [74]<br>China           | RCT                            | 4 General Hospitals ED<br><i>N</i> = 239       |            | Patients admitted to the ED after attempted suicide; aged > 15 years, mean age IG 34.06 ( <i>SD</i> = 15.84), mean age CG 32.12 ( <i>SD</i> = 13.87); 77.1% women    | Cognitive Therapy group ( <i>n</i> = 82) vs. Telephone intervention group ( <i>n</i> = 80), (3) vs. TAU ( <i>n</i> = 77)<br>12 weekly phone calls (20-40 min.) within 3-month period by professors.                                                                                                                                                                                                                                      | 12 months | Suicide Ideation (SSI) [79], Suicide attempt (Structured Interview)                                 |

244 AlgoS: decision-making algorithm for suicide; BIC: Brief Intervention and Contact; BSI: Brief Suicide Intervention; BSS: Beck Scale for

245 Suicidal Ideation; CBT: Cognitive Behaviour Therapy; CG: Control Group; CSSRS: Columbia Suicide Severity Rating Scale; DBT-BSI:

246 Dialectical Behaviour Therapy Skills-Based Intervention; DSH: Deliberate Self-Harm; ED-SAFE: Emergency Department Safety

247 Assessment and Follow-up Evaluation; ED: Emergency Department; EPSIS: European Parasuicide Study Interview Schedule; GHQ-

248 28: General Health Questionnaire; HR: Hazard Ratio; IG: Intervention Group; nRCT: Non-Randomised Controlled Trial; RCT:

249 Randomised Controlled Trial; RT: Relaxation Training; SAFETEL: safety planning and telephone follow-up intervention; SASI-Count:

250 Suicide Attempt Self-Injury Count; SIS: Beck's Suicide Intent Scale; SUPRE-MISS: Multisite Intervention Study on Suicidal Behaviours;

251 SSI: Scale for Suicide Ideation; SPI: Safety planning intervention; TAU: Treatment As Usual; UK: United Kingdom; USA: United States

252 of America.

253

254 Risk of bias in studies

255 The results of the RoB 2.0 [41] evaluation is presented in Table 2, in addition, the ROBINS-I [42]  
 256 evaluation is shown in Table 3. Inter-rater agreement was calculated using Cohen’s Kappa ( $\kappa =$   
 257 .94, CI 95%: 0.87 – 1.02) [77]. The overall RoB ratings were classified as low, moderate, or  
 258 serious. A total of 7 (26.9%) studies met the criteria to be classified as low risk of bias; in 12  
 259 (46.2%) studies the risk of bias was moderate; while in 7 (26.9%) studies the risk of bias was  
 260 high.

261

262 **Table 2**

263 RoB assessment using the RoB 2.0 [41].

|                                    | Randomisation process | Deviations from indented interventions | Missing outcome data | Measurement of the outcome | Selection of the report result | Overall bias |
|------------------------------------|-----------------------|----------------------------------------|----------------------|----------------------------|--------------------------------|--------------|
| Amadéo et al. (2015) [49]          | +                     | ?                                      | ?                    | +                          | +                              | +            |
| Bertolote et al. (2010) [50]       | +                     | +                                      | +                    | +                          | ?                              | +            |
| Cedereke et al. (2002) [53]        | +                     | ?                                      | -                    | +                          | ?                              | ?            |
| Christensen et al. (2013) [54]     | +                     | ?                                      | -                    | +                          | +                              | ?            |
| Comtois et al. (2019) [55]         | +                     | -                                      | ?                    | +                          | ?                              | ?            |
| Fleischmann et al. (2008) [57]     | +                     | +                                      | ?                    | +                          | +                              | +            |
| Hassanzadeh et al. (2010) [60]     | +                     | +                                      | +                    | +                          | ?                              | +            |
| Malakouti et al. (2021) [62]       | +                     | ?                                      | +                    | +                          | -                              | ?            |
| Messiah et al. (2019) [63]         | +                     | -                                      | +                    | +                          | ?                              | ?            |
| Mouaffak et al. (2015) [65]        | +                     | ?                                      | +                    | +                          | ?                              | +            |
| Mousavi et al. (2014) [66]         | +                     | +                                      | +                    | ?                          | ?                              | +            |
| Mousavi et al. (2016) [67]         | +                     | -                                      | ?                    | -                          | ?                              | -            |
| O’Connor et al. (2022) [68]        | +                     | ?                                      | -                    | +                          | +                              | ?            |
| Riblet et al. (2022) [70]          | +                     | +                                      | +                    | +                          | -                              | ?            |
| Vaiva et al. (2006) [71]           | +                     | +                                      | -                    | +                          | ?                              | -            |
| Vaiva et al. (2018) [72]           | +                     | +                                      | -                    | +                          | +                              | ?            |
| Ward-Ciesielski et al. (2017) [73] | +                     | +                                      | -                    | +                          | +                              | ?            |
| Wei et al. (2012) [74]             | +                     | -                                      | -                    | +                          | ?                              | -            |

264

265 Abbreviations: (+) indicates low risk of bias; the study is judged to be at low risk of bias for most domains, (-) high risk of bias; the  
 266 study is judged to be at high risk of bias in at least two domains OR the study is judged to have some concerns for multiple domains  
 267 in a way that substantially lowers confidence, and (?) moderate risk of bias; the study is judged to raise some concerns in at least  
 268 three domains.

269

270 **Table 3**

271 RoB assessment using the ROBINS-I [42].

|                                       | Confounding | Selection of participants | Classification of interventions | Deviations from intended intervention | Missing data | Measurement of outcomes | Selection of the reported results | Overall bias |
|---------------------------------------|-------------|---------------------------|---------------------------------|---------------------------------------|--------------|-------------------------|-----------------------------------|--------------|
| Cebrià et al. (2013) [51]             | ⊖           | ⊕                         | ⊕                               | ⊕                                     | ⊕            | ?                       | ⊕                                 | ?            |
| Cebrià et al. (2015) [52]             | ⊖           | ?                         | ⊕                               | ⊕                                     | ⊕            | ?                       | ⊕                                 | ⊖            |
| Exbrayat et al. (2017) [56]           | ?           | ⊕                         | ⊕                               | ⊕                                     | ?            | ?                       | ⊕                                 | ?            |
| Gabilondo et al. (2019) [58]          | ⊖           | ?                         | ?                               | ⊖                                     | ⊖            | ?                       | ⊕                                 | ⊖            |
| Goñi-Sarriés et al. (2022) [59]       | ⊖           | ⊕                         | ⊕                               | ?                                     | ?            | ⊕                       | ?                                 | ⊖            |
| López-Goñi & Goñi-Sarriés (2021) [61] | ⊖           | ⊕                         | ⊕                               | ?                                     | ?            | ?                       | ?                                 | ⊖            |
| Miller et al. (2017) [64]             | ⊖           | ⊕                         | ⊕                               | ⊕                                     | ⊕            | ⊕                       | ?                                 | ?            |
| Plancke et al. (2020) [69]            | ?           | ⊕                         | ⊕                               | ⊕                                     | ⊕            | ⊕                       | ?                                 | ⊕            |

272

273 Abbreviations: (+) indicates low risk of bias; the study is comparable to a well-performed randomized trial, (-) high risk of bias; the  
 274 study has some important problems, and (?) moderate risk of bias; the study is sound for a non-randomized study but cannot be  
 275 considered comparable to a well-performed randomized trial.

276

277 Results of individual studies

278 *Suicidal ideation*

279 The results of the meta-analysis of the effects of synchronous remote-based intervention on  
 280 suicidal ideation are shown in Figure 2. Among the 26 trials, three studies reported the effects  
 281 of the intervention on suicidal ideation within 1 month [54, 73, 70], two studies within 3 months  
 282 [70, 73], two studies within 6 months [54, 68], and three studies within 12 months [53 – 55].  
 283 There was a small, non-statistically significant effect (Hedge’s  $g = -0.23$ ; 95% CI  $-1.54 - 1.07$ ) on  
 284 the prevention of suicidal ideation.

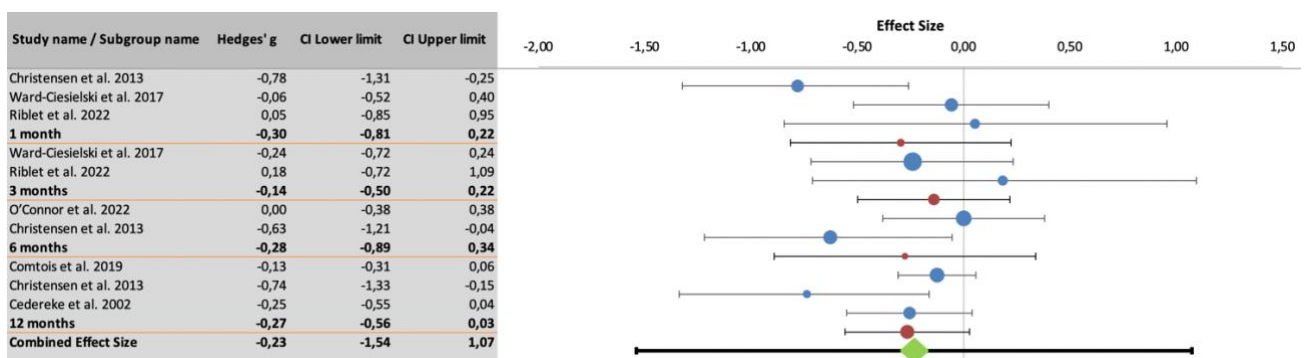

285

286

Heterogeneity:  $I^2 = 34.5\%$

287

Combined effect size: Hedge’s  $g = -0.23$ ; standard error = 0.58; 95% CI  $-1.54 - 1.07$



288 **Figure 2** Forest plot comparing effects of synchronous – remote interventions on suicidal  
 289 ideation with subgroup analysis according to the time frame of the evaluation measures.

290

291 *Suicide attempts*

292 The results of the meta-analysis of the effects of synchronous remote-based intervention on  
 293 suicide reattempts are shown in Figure 3. Among the 26 trials, five studies reported the effects  
 294 of the intervention on suicidal ideation within 1 month [56, 66, 67, 70, 73], four studies within 3  
 295 months [67, 70, 73, 74], 8 studies within 6 months [60, 63, 66 – 69, 72, 74], 10 studies within 12  
 296 months [51, 55, 58, 59, 61, 62, 64, 65, 69, 74], four studies within 13 months [53, 63, 71, 72],  
 297 and two studies within 18 months [49, 50]. There was a statistically significant effect (OR = 0.75;  
 298 95% CI 0.62 – 0.90) on the reduction (25%) of suicide attempt, although there was severe  
 299 heterogeneity (78.8%).

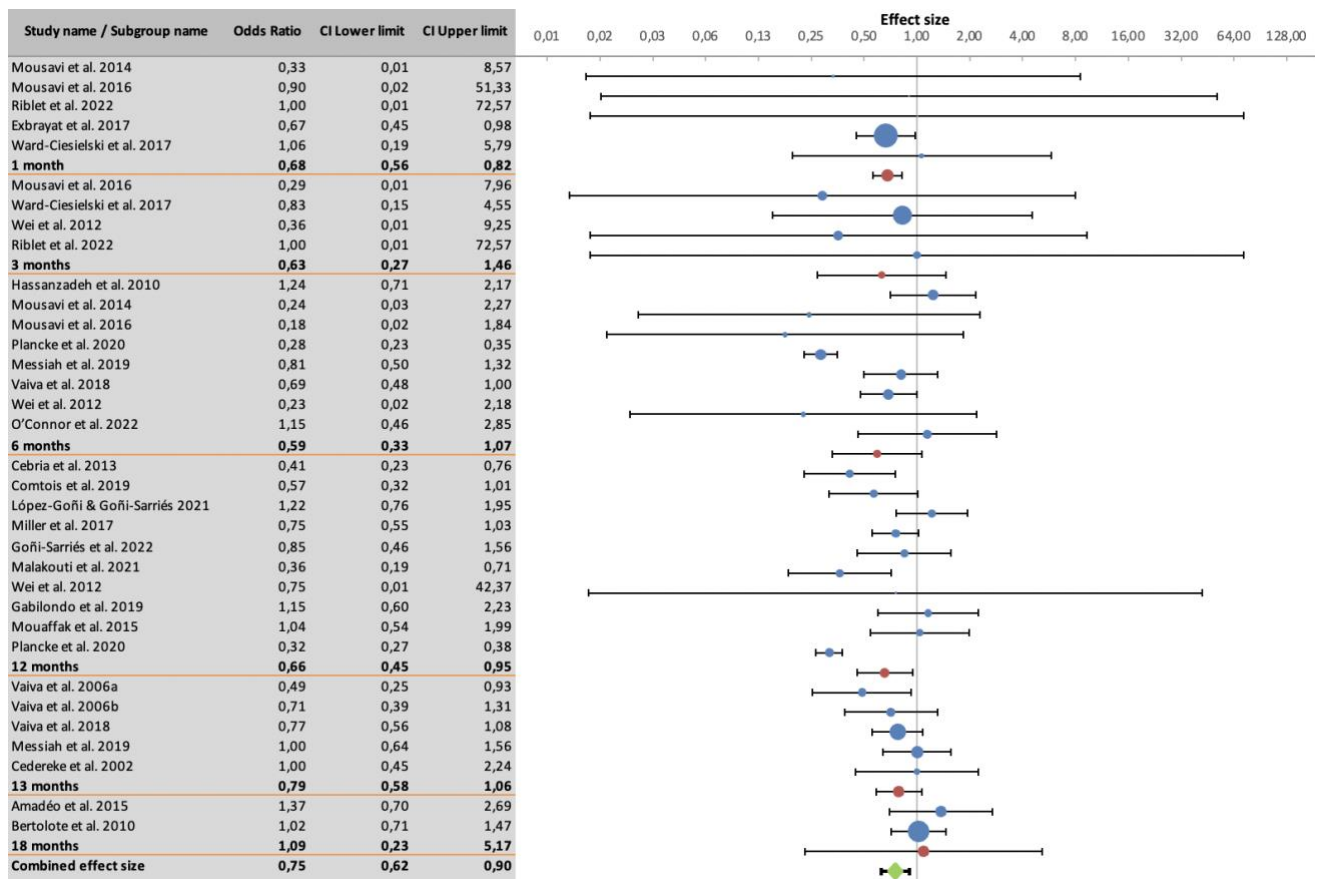

300

301

Heterogeneity:  $I^2 = 78.8\%$

302

Combined effect size: OR = 0.75; 95% CI 0.62 – 0.90

303 **Figure 3** Forest plot comparing effects of synchronous – remote interventions on suicide

304 attempts with subgroup analysis according to the time frame of the evaluation measures.

305

306 *Suicide death*

307 The results of the meta-analysis of the effects of synchronous remote-based intervention on

308 suicide deaths are shown in Figure 4. Among the 26 trials, two studies reported the effects of

309 the intervention on suicide deaths within 6 months [60, 72], five studies within 12 months [55,

310 59, 61, 64, 65], two studies within 13 months [71, 72], and two studies within 18 months [49,

311 57]. There was a statistically significant effect (Peto OR = 0.37; 95% CI 0.18 – 0.77) on the

312 reduction (63%) of suicide deaths.

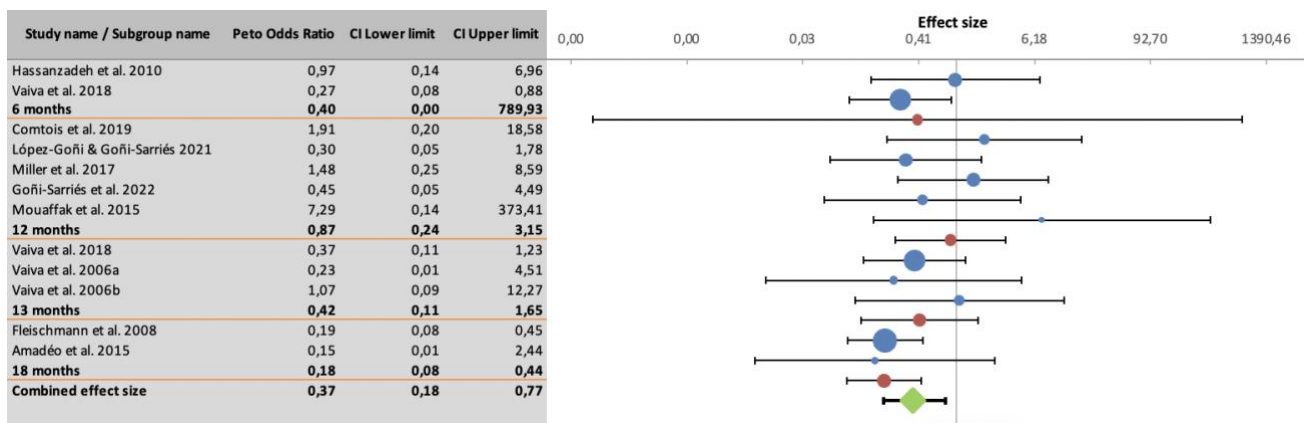

313

Heterogeneity:  $I^2 = 3.8\%$

314

Combined effect size: Peto OR = 0.37; 95% CI 0.18 – 0.77

315

316 **Figure 4** Forest plot comparing effects of synchronous – remote interventions on suicide deaths

317 with subgroup analysis according to the time frame of the evaluation measures.

318

319 Results of narrative synthesis

320 *Effects of Telephone Contact Interventions on Suicidal Behaviours*

321 A total of 14 articles examined the efficacy of Telephone Follow-up Interventions in the

322 prevention of suicidal ideation, suicide attempts, and suicide deaths [51 – 53, 56, 58, 59, 61, 62,

323 66, 67, 69, 71, 72, 74]. The studies by Cebrià *et al.* [51], Exbrayat *et al.* [56], Malakouti *et al.* [62],  
324 Plancke *et al.* [69], and Vaiva *et al.* [71] reported differences for suicide reattempts in the  
325 intervention group compared to the control group, and a significant effect of the intervention  
326 group in reducing the rate of reattempts. Cebrià *et al.* [52], after a 60-month follow-up, indicated  
327 that there was no significant difference in either group in terms of suicide reattempts (31.4% vs.  
328 34.4%,  $p = .40$ ). The reattempt prevention effect observed in the first 12 months of follow-up  
329 was not sustained over 5 years of follow-up.

330 Cedereke *et al.* [53] and Mousavi *et al.* [67] found significant reductions for suicidal  
331 ideation, regardless of the intervention condition, although no significant differences between  
332 groups were reported. On the other hand, Wei *et al.* [74] compared a telephone intervention  
333 with a cognitive therapy group and a control group, showing reductions in the number of suicide  
334 reattempts between intervention and control groups (1.3% vs. 6.5%,  $p = .08$ ), although the  
335 differences were marginally significant. No statistically significant differences in suicidal ideation  
336 were shown between the three groups at any assessment point (baseline:  $p = .43$ , 3-month:  $p =$   
337  $.72$ , 6-month:  $p = .75$ , 12-month:  $p = .67$ ).

338 Gabilondo *et al.* [58], Goñi-Sarriés *et al.* [59], López-Goñi & Goñi-Sarriés [61], Mousavi  
339 *et al.* [66], Mousavi *et al.* [67], and Vaiva *et al.* [72] reported no significant differences between  
340 intervention and control groups for suicide reattempts. In addition, Goñi-Sarriés *et al.* [59]  
341 informed that there were no significant differences for suicide deaths. More detailed  
342 information in Table 1.

343

#### 344 *Effects of Text Message Interventions on Suicidal Behaviours*

345 Comtois *et al.* [55] conducted a follow-up text-messaging intervention with soldiers and marines  
346 targeted as being at risk for suicide. Eleven contacts were made by mental health clinicians, with  
347 participants' text message responses monitored 24 hours a day. The authors reported no  
348 significant effect of the intervention on the presence or severity of current suicidal ideation;

349 furthermore, the intervention did not significantly decrease the odds of a suicide risk incident  
350 during the 12 months follow-up period.

351

### 352 Effects of Multi-component Interventions on Suicidal Behaviours

353 A total of 11 articles examined the efficacy of a multi-component Synchronous Telepsychiatry  
354 Strategies– e.g., 1-hour psychoeducational session plus telephone contacts– in the prevention  
355 of suicidal ideation, suicide attempts, and suicide deaths [49, 50, 54, 57, 60, 63 – 65, 68, 70, 73].  
356 Miller *et al.* [64] evaluated the ED-SAFE intervention, which consisted of a risk screening and 7  
357 post-ED telephone calls. No significant differences in risk reduction were found between the  
358 TAU and screening phases (22.9% vs. 21.5%,  $p = .99$ ). Mouaffak *et al.* [65] delivered postcards,  
359 in combination with the possibility of calling a 24-hour telephone, and with telephone follow-  
360 up at 2 weeks, 1, and 3 months after discharge from the ED. No significant differences were  
361 found between the intervention and control groups for suicide reattempts (14.5% vs. 14%, OR  
362 = 1.01, 95% CI 0.52 – 1.97,  $p = .89$ ). Messiah *et al.* [63] evaluated the effectiveness of the AlgoS  
363 Algorithm, which consisted of a telephone follow-up for multi-attempters or a crisis card for  
364 first-attempts versus TAU. Telephone follow-up was conducted at 10 and 21 days by a  
365 psychologist. There was no significant difference for multi-attempters in the intervention group  
366 compared to the control group for suicide reattempts at 6 (Relative Risk; RR = 0.84, 95% CI 0.57  
367 – 1.25) and 14 months (RR = 1.00, 95% CI 0.73 – 1.37).

368 Amadéo *et al.* [49], Bertolote *et al.* [50], Fleischmann *et al.* [57], and Hassanzadeh *et al.*  
369 [60] investigated the efficacy of BIC, using brief 1-hour educational intervention combined with  
370 telephone contacts at 1, 2, 4, 7, 11 weeks, 4, 6, 12, and 18 months delivered by physicians,  
371 psychiatric nurses, psychologists, psychiatrists, or social workers. No significant reduction was  
372 found in the intervention group compared to the control group for suicide reattempts, although,  
373 a significant reduction in suicide deaths in the intervention group compared with the control  
374 group (0.2% vs. 2.2%,  $p < .001$ ) at 18-months was reported in the study by Fleischmann *et al.*

375 [57]. In a similar intervention protocol, Riblet *et al.* [70] contacted by telephone or video over 3  
376 months, mailed educational materials, and performed a 1-hour educational intervention on  
377 suicide prevention also by telephone or video. A reduction in suicidal ideation was found in the  
378 intervention group compared with the control group at 1 and 3 months, with effect sizes in the  
379 medium to large range for suicidal ideation (Hedges'  $g = 0.71$ ). No suicide attempts occurred  
380 during the study.

381 Christensen *et al.* [54] conducted a web-based CBT intervention combined with  
382 telephone follow-up compared with a CBT-only intervention and a TAU group. CBT was delivered  
383 in five modules and telephone contacts were provided weekly by a 24h telephone counselling  
384 service. Significant reductions in suicidal ideation, in the telephone call condition, at 1-month  
385 post-intervention ( $p = .003$ ), 6-month follow-up ( $p = .03$ ), and 12-month follow-up ( $p = .01$ ) were  
386 found. Similarly, Ward-Ciesielski *et al.* [73] conducted a single-session Dialectical Behaviour  
387 Therapy Skills-Based Intervention (DBT-BSI) and telephone follow-up at 1, 4, and 12 weeks,  
388 compared with a control group. A significant reduction in levels of suicidal ideation was reported  
389 in both conditions, although there were no significant differences between conditions for  
390 suicidal ideation and number of suicide attempts. O'Connor *et al.* [68] evaluated the effects of  
391 the SAFETEL intervention against TAU. A safety planning intervention (SPI) session and 5 weekly  
392 optional telephone calls were conducted. No significant differences were found between the  
393 intervention group and the control group for suicide attempts (Incidence Rate Ratio; IRR = 1.10,  
394 95% CI 0.43 – 2.79,  $p = .85$ ).

395

#### 396 *Effects of Synchronous Remote-Based Interventions on Treatment Adherence*

397 Seventeen studies reported on outcomes relating to treatment attendance [49 – 53, 57 – 63, 68,  
398 71 – 74]. In relation to the moderating effect of adherence on the efficacy of the intervention:  
399 Gabilondo *et al.* [58] observed that the intervention group showed significantly higher  
400 adherence to outpatient follow-up ( $p < .001$ ); in addition, Hassanzadeh *et al.* [60] revealed an

401 increase in patients' perceived need for support ( $p < .001$ ) and positively influenced attitudes  
402 toward seeking support from services and family.

403         According to Cebrià *et al.* [52], suicide attempters tend to be ambivalent to treatment,  
404 do not attend treatment, or drop out prematurely; complementary, López-Goñi & Goñi-Sarriés  
405 [61] showed in their study that completion of the Telephone Follow-up Programme (TFP)  
406 correlated with a reduction in suicidal behaviours. Ward-Ciesielski *et al.* [73], and Wei *et al.* [74]  
407 also mention that the 75% retention rate underscores the acceptability and effectiveness of the  
408 study in engaging a historically hard-to-reach and difficult-to-retain population. Fleischmann *et*  
409 *al.* [57] mention that BIC operates similarly to psychosocial counselling, providing temporary  
410 social support and fostering feelings of connectedness through systematic follow-up contacts.

411         Moreover, Vaiva *et al.* [71] reported that participants in the intervention group  
412 discussed their suicide attempt with their primary care physician more frequently than controls.  
413 As mentioned by Messiah *et al.* [63] telephone calls could complement a multimodal strategy,  
414 providing a surveillance tool to drive more aggressive interventions.

415         In relation to the predictor or moderator variables of adherence: Amadéo *et al.* [49],  
416 López-Goñi & Goñi-Sarriés [61], O'Connor *et al.* [68], Vaiva *et al.* [71], and Vaiva *et al.* [72]  
417 concurred that patients lost to follow-up were more likely to be male. Gabilondo *et al.* [58],  
418 Goñi-Sarriés *et al.* [59], López-Goñi & Goñi-Sarriés [61], Vaiva *et al.* [71], and Vaiva *et al.* [72]  
419 concluded that the intervention could be more effective for higher risk populations requiring  
420 additional support; in these studies, patients who completed PTF demonstrated higher severity  
421 of suicide attempts, greater psychopathological severity, used more violent methods, and  
422 experienced predominantly affective disorders. In contrast, Ward-Ciesielski *et al.* [73] found that  
423 participants lost to follow-up reported higher levels of depression and anxiety. On the other  
424 hand, four studies [57, 62, 68, 74] discussed stigma around suicide as a factor that may affect  
425 patients' attitudes toward seeking support from mental health services and family. More  
426 detailed information in Supplemental File 2: Table S2.

427

428 *Causes of heterogeneity among study results*

429 The investigations on the possible causes of heterogeneity between the outcomes of suicidal  
430 ideation ( $I^2 = 34.5\%$ ) and suicide attempts ( $I^2 = 78.8\%$ ) of the selected studies raise the  
431 pertinence of qualitatively synthesizing the results due to heterogeneity in: a) the evaluation  
432 measures time frame of the outcomes (Supplementary File 3. Table S3), b) the protocol of  
433 intervention design and the characteristics of the intervention and control group– i.e., target  
434 effect, measures of effect, method of implementation, administrator-participant interaction,  
435 periodicity, number and duration of the intervention, professional delivering the intervention,  
436 setting, participants, etc. – (Supplementary File 1. Table S1), c) assessment of risk of bias and  
437 study design– differences were observed in the result of RCT versus nRCT studies for suicide  
438 attempts and suicide deaths outcomes– (Supplementary File 4. Figure S1; Figure S2).  
439 Conclusions regarding the efficacy of synchronous and remote interventions for suicide  
440 prevention are complex, given the large heterogeneity reflected in the studies conducted to  
441 date.

442

## 443 **DISCUSSION**

444 Innovation in the prevention and management of suicidal behaviour is a therapeutic challenge  
445 [86]. The present research outlines emerging evidence on suicide prevention through  
446 telemedicine in reducing suicidal ideation and behaviours; however, it is not possible to confirm  
447 the effectiveness of the interventions, as the methodological and procedural heterogeneity of  
448 the available articles does not allow for a quantitative synthesis of the accumulated scientific  
449 evidence.

450 The studies considered investigate the provision of information and counselling to  
451 people with suicidal ideation and a history of suicide attempts, (1) assessing the current risk of  
452 suicidal behaviour; (2) reinforcing adherence to treatment and follow-up by a health

453 professional; (3) contributing to psychoeducation and identification of factors related to suicidal  
454 behaviour; and (4) providing crisis intervention in case of detection of an immediate risk  
455 situation. The neologism "connectivity" serves as the central concept in the majority of studies  
456 [34]. In addition, the importance of a high frequency of follow-up contacts, earlier intervention,  
457 and involvement in the most critical period— i.e., 6 months post-discharged from ED— is also  
458 underlined [10, 13, 34, 71]. Reducing loss to follow-up is a critical challenge in suicide  
459 prevention, especially during the post-discharge period [13, 87], given historical problems with  
460 treatment completion among people involved in suicidal behaviour [88 – 91]. According to  
461 Gabilondo *et al.* [58] BIC reduce loneliness, increase knowledge about suicide prevention, and  
462 improve adherence to routine treatment. Along the same lines, Ward-Ciesielski *et al.* [73]  
463 reported that a notable percentage of participants engaged with mental health services, or  
464 initiated psychotherapy, or pharmacotherapy during the synchronous remote intervention  
465 follow-up, suggesting a significant benefit of these interventions with a treatment-unengaged  
466 population. Nevertheless, Cedereke *et al.* [53] argued that more research is needed to establish  
467 the relationship between adherence to treatment and reduction in suicidal behaviour.

468         The wide variety of distance programmes for suicide prevention, and the current lack of  
469 treatment guidance on their implementation warrant further research to improve and  
470 standardise patient care. As concluded in the systematic review by Noh *et al.* [32] more  
471 structured and theory-based interventions for the prevention of suicidal behaviours should be  
472 conducted and examined, emphasizing the importance of a conceptual and theoretical  
473 framework in the development of interventions and to increase measurable impacts on key  
474 outcomes in complex interventions [92]. Despite the common prevention approach, significant  
475 variations were found in the procedure of the intervention, and comparison group— i.e.,  
476 periodicity, number of contacts, moment of assessment, content, practitioner, setting, type of  
477 usual treatment, etc.—, as well as in the methodology— i.e., study design, and RoB— of the  
478 reviewed studies. Heterogeneity of results could be due to differences in the length of follow-



479 up, the methods used in the different programmes, variability in the number of sessions, or  
480 different patient inclusion criteria. Replication of these interventions according to a  
481 standardised protocol would facilitate more consistent results [93]. In addition, the lack of  
482 adequate reporting of information on the intervention group, comparison group, and TAU  
483 components of the studies constitutes an important gap in the literature and opens new lines  
484 of research.

485

#### 486 Recommendations

487 In accordance with the synthesis of information and the articles collected on the topic  
488 of the review, the authors would like to provide a series of recommendations to standardise the  
489 implementation and development of these interventions to obtain data that can be meta-  
490 analysed in the future. Firstly, the authors of future studies should consider describing in detail  
491 a minimum set of component characteristics of the intervention and comparison groups–  
492 particularly for TAU group– as there is considerable heterogeneity between studies. A  
493 comprehensive quality checklist is presented in Supplementary file 5. Table S4. In addition, it  
494 should be evaluated not only for efficacy and effectiveness, but also for cost-effectiveness,  
495 adherence to the intervention and TAU, etc.

496 Secondly, a universal intervention design protocol should be adopted according to the  
497 characteristics of the studies in which an effect has been observed and the recommendations  
498 of the authors of previous studies on the topic [51, 54, 56, 57, 62, 69, 71, 72]. Overall, the  
499 recommendation is for RCT study designs that provide early interventions after discharge from  
500 the ED–maximum 7 days– with long-term follow-up– approximately 12 months–, often as  
501 concomitant therapy to TAU– i.e., emergency medical care and follow-up based on severity of  
502 suicidal behaviour; psychopharmacology and/or psychotherapy– conducted by a mental health  
503 professional to promote suicide risk assessments, clinician-patient connection, and adherence  
504 to routine treatment.

505

506 Strength and limitations

507 The main limitation of the present review is the lack of efficacy measurement to determine  
508 which protocol of telemedicine for suicide prevention is the most recommendable. The present  
509 review is not intended to criticize the selected articles, but to offer opportunities for improving  
510 future research. Therefore, we propose recommendations for methodological and practical  
511 guidance in developing synchronous remote interventions for suicide prevention  
512 (Supplementary file 5. Table S4).

513 The focus of the present review was synchronous remote-based interventions;  
514 therefore, many studies using asynchronous telecommunication devices– i.e., crisis card, self-  
515 directed web-based programmes, etc.– were excluded. In addition, the limitation of using ED  
516 medical data records or the authorities' forensic registry is the possibility of underreporting the  
517 actual number of nonfatal suicidal behaviours [94]; additionally, suicide is a rare event, making  
518 the design of studies with high statistical power particularly difficult. Finally, the included trials  
519 used intervention and comparison groups that received TAU; these treatments are often  
520 different across studies.

521

522 Conclusions

523 Promoting comprehensive mental health treatment, emphasising follow-up and continuity of  
524 care after discharge from the ED may help prevent repeat suicide attempts; however, the  
525 precise mechanisms by which interventions reduce repeated suicidal behaviour are unclear, and  
526 more protocolised research is required. The effects of telemedicine-based interventions in  
527 multicomponent programs remain difficult to assess.

528

529 **ETHICS AND DISSEMINATION**

530 Ethics approval is not needed, as systematic reviews are based on published studies. The results  
531 will be disseminated through peer-reviewed publications.

532

### 533 **Ethics statements**

534 Patient consent for publication

535 Not applicable.

536

537 **Contributors** AS is the guarantor. LC, JML, DP, AC, and AS: Writing - Original Draft. LC, AS, MPJ,  
538 JPS, and CM: Software. LC, JML, DP and AS: Project administration, Supervision. All authors:  
539 Conceptualization, Methodology, Writing - Review & Editing. JML, AS, JPS, and CM provided  
540 statistical expertise. DP and AC provided expertise on suicidal behaviours. All authors approved  
541 the final manuscript.

542

543 **Acknowledgements** Authors' thanks Guillem Cebrián (GC), director of the Library Hospital  
544 Universitari Parc Taulí and head of the Unitat de Gestió del Coneixement de l'Institut  
545 d'Investigació i Innovació Parc Taulí (I3PT-CERCA), for his invaluable support in the refinement  
546 of the search strategies. Authors' gratitude goes to Universitat Autònoma de Barcelona and  
547 Hospital Universitari Parc Taulí for critically analysing the study proposal and motivational  
548 support to conduct this protocol. DP thanks the support of Spanish Ministry of Science and  
549 Innovation/ISCIII/FEDER (PI21/01148); the Secretaria d'Universitats i Recerca del Departament  
550 d'Economia i Coneixement of the Generalitat de Catalunya (2021 SGR 01431); the CERCA  
551 programme of the I3PT; the Instituto de Salud Carlos III; and the CIBER of Mental Health  
552 (CIBERSAM). The research has been previously presented at a conference and has been  
553 published as a conference abstract [76].

554

555 **Funding** This research was funded by the Instituto de Salud Carlos III, Subdirección General de  
556 Evaluación y Fomento de la Investigación (ISCIII) and Fondo Europeo de Desarrollo Regional  
557 (FEDER). The APC was funded by the Instituto de Salud Carlos III, Subdirección General de  
558 Evaluación y Fomento de la Investigación (ISCIII) and Fondo Europeo de Desarrollo Regional  
559 (FEDER). The funders had no role in the design of the study; in the collection, analysis, or  
560 interpretation of data; in the writing of the manuscript; or in the decision to publish the results.  
561 The Department of Mental Health of Hospital Universitari Parc Taulí, Unitat Mixta de  
562 Neurociència Traslacional I3PT-INc-UAB, is the sponsor.

563

564 **Competing interests** D.P. has received grants and also served as a consultant or advisor for Rovi,  
565 Angelini, Janssen, Lundbeck and Servier. The other authors declare no conflicts of interest.

566

567 **Patient consent for publication** Not applicable.

568

569 **Supplemental material** Supplementary File 1. Information on the components and  
570 characteristics of the intervention and comparison groups (DOCX 29 KB).

571 Supplementary File 2. Information on therapeutic adherence (DOCX 29 KB).

572 Supplementary File 3. Evaluation measures time frame of the selected studies (DOCX 31 KB).

573 Supplementary File 4. Forest plot comparing effects of synchronous – remote interventions on  
574 suicidal behaviours with subgroup analysis according to the study design (DOCX 677 KB).

575 Supplementary File 5. Report of the minimum set of component characteristics (DOCX 23 KB).

576

577 **Open access** This is an open access article distributed in accordance with the Creative Commons  
578 Attribution Non Commercial (CC BY-NC 4.0) license, which permits others to distribute, remix,  
579 adapt, build upon this work non-commercially, and license their derivative works on different  
580 terms, provided the original work is properly cited, appropriate credit is given, any changes are

581 made indicated, and the use is non-commercial. See: [http://creativecommons.org/licenses/by-](http://creativecommons.org/licenses/by-nc/4.0/)  
582 [nc/4.0/](http://creativecommons.org/licenses/by-nc/4.0/).

583

#### 584 **ORCID iDs**

585 Laura Comendador Vázquez <https://orcid.org/0000-0002-5221-4794>

586 María P. Jiménez-Villamizar <https://orcid.org/0000-0003-2264-7422>

587 Josep-Maria Losilla <https://orcid.org/0000-0002-5140-5847>

588 Juan P. Sanabria-Mazo <https://orcid.org/0000-0003-1688-435X>

589 Corel Mateo-Canedo <https://orcid.org/0000-0002-0620-9257>

590 Ana Isabel Cebrià Meca <https://orcid.org/0000-0002-2632-8130>

591 Antoni Sanz Ruíz <https://orcid.org/0000-0002-7952-4477>

592 Diego J. Palao Vidal <https://orcid.org/0000-0002-3323-6568>

593

#### 594 **REFERENCES**

595 1. World Health Organization. Suicide [online]. 2023. [https://www.who.int/news-room/fact-](https://www.who.int/news-room/fact-sheets/detail/suicide)  
596 [sheets/detail/suicide](https://www.who.int/news-room/fact-sheets/detail/suicide) (accessed 06 April 2024).

597 2. World Health Organization. Suicide worldwide in 2019 [online]. 2021.  
598 <https://www.who.int/publications-detail-redirect/9789240026643> (accessed 30 Jan 2022).

599 3. World Health Organization. Suicide in the world: Global health estimates [online]. 2019.  
600 [https://apps.who.int/iris/bitstream/handle/10665/326948/WHO-MSD-MER-19.3-](https://apps.who.int/iris/bitstream/handle/10665/326948/WHO-MSD-MER-19.3-eng.pdf?sequence=1&isAllowed=y)  
601 [eng.pdf?sequence=1&isAllowed=y](https://apps.who.int/iris/bitstream/handle/10665/326948/WHO-MSD-MER-19.3-eng.pdf?sequence=1&isAllowed=y) (accessed 30 Jan 2022).

602 4. Artieda-Urrutia P, Parra-Urbe I, Garcia-Pares G, *et al*. Management of suicidal behaviour: Is  
603 the world upside down? *Aust N Z J Psychiatry* 2014;48:399–401.  
604 <https://doi.org/10.1177/0004867414525847>

605 5. Mokdad AH, Forouzanfar MH, Daoud F, *et al*. Global burden of diseases, injuries, and risk  
606 factors for young people's health during 1990–2013: A systematic analysis for the Global

- 607 Burden of Disease Study 2013. *Lancet* 2016;387:2383–401. <https://doi.org/10.1016/S0140->  
608 [6736\(16\)00648-6](https://doi.org/10.1016/S0140-6736(16)00648-6)
- 609 6. Parra-Uribe I, Blasco-Fontecilla H, García-Parés G, *et al.* Attempted and completed suicide:  
610 Not what we expected? *J Affect Disord* 2013;150:840–6.  
611 <https://doi.org/10.1016/j.jad.2013.03.013>
- 612 7. World Health Organization. Suicide: key facts. Geneva: World Health Organization [online].  
613 2021. <https://www.who.int/news-room/fact-sheets/detail/suicide> (accessed 06 April  
614 2024).
- 615 8. Olfson M, Wall M, Wang S, *et al.* Suicide following deliberate self-harm. *Am J Psychiat*  
616 2017;174:765–74. <https://doi.org/10.1176/appi.ajp.2017.16111288>
- 617 9. Shand F, Vogl L, Robinson J. Improving patient care after a suicide attempt. *Australas*  
618 *Psychiatry* 2018;26:145–8. <https://doi.org/10.1177/1039856218758560>
- 619 10. Parra-Uribe I, Blasco-Fontecilla H, Garcia-Parés G, *et al.* Risk of re-attempts and suicide death  
620 after a suicide attempt: A survival analysis. *BMC Psychiatry* 2017;17:163.  
621 <https://doi.org/10.1186/s12888-017-1317-z>
- 622 11. Bostwick JM, Pabbati C, Geske JR, McKean AJ. Suicide Attempt as a Risk Factor for Completed  
623 Suicide: Even More Lethal Than We Knew. *Am J Psychiatry*. 2016;173(11):1094-1100.  
624 <https://doi.org/10.1176/appi.ajp.2016.15070854>
- 625 12. Zalsman G, Hawton K, Wasserman D, *et al.* Evidence-based national suicide prevention  
626 taskforce in Europe: A consensus position paper. *Eur Neuropsychopharmacol* 2017;27:418–  
627 21. <https://doi.org/10.1016/j.euroneuro.2017.01.012>
- 628 13. Inagaki M, Kawashima Y, Yonemoto N, *et al.* Active contact and follow-up interventions to  
629 prevent repeat suicide attempts during high-risk periods among patients admitted to  
630 emergency departments for suicidal behavior: A systematic review and meta-analysis. *BMC*  
631 *Psychiatry* 2019;19:44. <https://doi.org/10.1186/s12888-019-2017-7>

- 632 14. Ganz D, Braquehais MD, Sher L. Secondary Prevention of Suicide. *PLoS Med*  
633 2010;7:e1000271. <https://doi.org/10.1371/journal.pmed.1000271>
- 634 15. World Health Organization. The European Mental Health Action Plan 2013–2020 [online].  
635 2013. [https://www.euro.who.int/\\_data/assets/pdf\\_file/0020/280604/WHO-Europe-](https://www.euro.who.int/_data/assets/pdf_file/0020/280604/WHO-Europe-Mental-Health-Acion-Plan-2013-2020.pdf)  
636 [Mental-Health-Acion-Plan-2013-2020.pdf](https://www.euro.who.int/_data/assets/pdf_file/0020/280604/WHO-Europe-Mental-Health-Acion-Plan-2013-2020.pdf) (accessed 15 Feb 2022).
- 637 16. World Health Organization. Preventing suicide: A global imperative [online]. 2014.  
638 [https://www.who.int/mental\\_health/suicide-prevention/exe\\_summary\\_english.pdf?ua=1](https://www.who.int/mental_health/suicide-prevention/exe_summary_english.pdf?ua=1)  
639 (accessed 15 Feb 2022).
- 640 17. World Health Organization. Comprehensive mental health action plan 2013–2030 [online].  
641 2021. <https://apps.who.int/iris/rest/bitstreams/1371507/retrieve> (accessed 15 Feb 2022).
- 642 18. Inagaki M, Kawashima Y, Kawanishi C, *et al*. Interventions to prevent repeat suicidal  
643 behavior in patients admitted to an emergency department for a suicide attempt: A meta-  
644 analysis. *J Affect Disord* 2015;175:66–78. <https://doi.org/10.1016/j.jad.2014.12.048>
- 645 19. Zalsman G, Hawton K, Wasserman D, *et al*. Suicide prevention strategies revisited: 10-year  
646 systematic review. *Lancet Psychiatry* 2016;3:646–59. [https://doi.org/10.1016/S2215-](https://doi.org/10.1016/S2215-0366(16)30030-X)  
647 [0366\(16\)30030-X](https://doi.org/10.1016/S2215-0366(16)30030-X)
- 648 20. Andersson G, Titov N, Dear BF, Rozental A, Carlbring P. Internet-delivered psychological  
649 treatments: from innovation to implementation. *World Psychiatry*. 2019;18(1):20-28.  
650 <https://doi.org/10.1002/wps.20610>
- 651 21. Carlbring P, Hadjistavropoulos H, Kleiboer A, Andersson G. A new era in Internet  
652 interventions: The advent of Chat-GPT and AI-assisted therapist guidance. *Internet Interv*.  
653 2023;32:100621. <https://doi.org/10.1016/j.invent.2023.100621>
- 654 22. Laranjeira C, Carvalho D, Valentim O, *et al*. Therapeutic Adherence of People with Mental  
655 Disorders: An Evolutionary Concept Analysis. *Int J Environ Res Public Health*.  
656 2023;20(5):3869. <https://doi.org/10.3390/ijerph20053869>

- 657 23. Deng M, Zhai S, Ouyang X, Liu Z, Ross B. Factors influencing medication adherence among  
658 patients with severe mental disorders from the perspective of mental health professionals.  
659 *BMC Psychiatry*. 2022;22(1):22. <https://doi.org/10.1186/s12888-021-03681-6>
- 660 24. Kauppi K, Hätönen H, Adams CE, Välimäki M. Perceptions of treatment adherence among  
661 people with mental health problems and health care professionals. *J Adv Nurs*.  
662 2015;71(4):777-788. <https://doi.org/10.1111/jan.12567>
- 663 25. Gilat I, Shahar G. Emotional first aid for a suicide crisis: Comparison between telephonic  
664 hotline and Internet. *Psychiatry-Interpers Biol Process* 2007;70:12–8.  
665 <https://doi.org/10.1521/psyc.2007.70.1.12>
- 666 26. Seong JM, Cho Y, Cho GC, *et al*. Effects of mobile messenger counseling on case management  
667 success for individuals engaging in self-harm or suicide attempts who were discharged from  
668 emergency departments. *Clin Exp Emerg Med* 2021;8:48–54.  
669 <https://doi.org/10.15441/CEEM.20.133>
- 670 27. Vijayakumar L, Umamaheswari C, Shujaath Ali Z, *et al*. Intervention for suicide attempters:  
671 A randomized controlled study. *Indian J Psychiatry* 2011;53:244–8.  
672 <https://doi.org/10.4103/0019-5545.86817>
- 673 28. Martínez-Alés G, Cruz Rodríguez JB, Lázaro P, *et al*. Cost-effectiveness of a Contact  
674 Intervention and a Psychotherapeutic Program for Post-discharge Suicide Prevention. *Can J*  
675 *Psychiatry*. 2021;66(8):737-746 <https://doi.org/10.1177/0706743720980135>
- 676 29. De Leo D, Buono MD, Dwyer J. Suicide among the elderly: The long-term impact of a  
677 telephone support and assessment intervention in northern Italy. *Br J Psychiatry*  
678 2002;181:226–9. <https://doi.org/10.1192/bjp.181.3.226>
- 679 30. Gould MS, Munfakh JLH, Kleinman M, *et al*. National Suicide Prevention Lifeline: Enhancing  
680 mental health care for suicidal individuals and other people in crisis. *Suicide Life-Threat*  
681 *Behav* 2012;42:22–35. <https://doi.org/10.1111/j.1943-278X.2011.00068.x>



- 682 31. Milner AJ, Carter G, Pirkis J, *et al.* Letters, green cards, telephone calls and postcards:  
683 Systematic and meta-analytic review of brief contact interventions for reducing self-harm,  
684 suicide attempts and suicide. *Br J Psychiatry* 2015;206:184–90.  
685 <https://doi.org/10.1192/bjp.bp.114.147819>
- 686 32. Noh D, Park YS, Oh EG. Effectiveness of telephone-delivered interventions following suicide  
687 attempts: A systematic review. *Arch Psychiatr Nurs* 2016;30:114–9.  
688 <https://doi.org/10.1016/j.apnu.2015.10.012>
- 689 33. Shin, H.D., Durocher, K., Sequeira, L. *et al.* Information and communication technology-  
690 based interventions for suicide prevention implemented in clinical settings: a scoping  
691 review. *BMC Health Serv Res.* 23, 281 (2023). <https://doi.org/10.1186/s12913-023-09254-5>
- 692 34. Luxton DD, June JD, Comtois KA. Can postdischarge follow-up contacts prevent suicide and  
693 suicidal behavior? A Review of the Evidence. *Crisis* 2013;34:32–41.  
694 <https://doi.org/10.1027/0227-5910/a000158>
- 695 35. Comendador L, Jiménez-Villamizar MP, Losilla JM, *et al.* Effect of synchronous remote-based  
696 interventions on suicidal behaviours: protocol for a systematic review and meta-analysis.  
697 *BMJ Open.* 2023;13(12):e075116. <https://doi.org/10.1136/bmjopen-2023-075116>
- 698 36. Page MJ, Moher D, Bossuyt PM, *et al.* PRISMA 2020 explanation and elaboration: updated  
699 guidance and exemplars for reporting systematic reviews. *BMJ.* 2021;372:n160.  
700 <https://doi.org/10.1136/bmj.n160>
- 701 37. World Health Organization. ICD-11 for mortality and morbidity statistics [online]. 2021.  
702 <https://icd.who.int/browse11/l-m/en#/http://id.who.int/icd/entity/778734771> (accessed  
703 15 Feb 2022).
- 704 38. Gómez A, Silva H, Amon R. El Suicidio. Teoría, Clínica y Manejo. Barcelona, ES: Editorial  
705 Mediterráneo 2018.

- 706 39. McGowan J, Sampson M, Salzwedel DM, *et al.* PRESS Peer Review of Electronic Search  
707 Strategies: 2015 Guideline Statement. *J Clin Epidemiol* 2016;75:40–6.  
708 <https://doi.org/10.1016/j.jclinepi.2016.01.021>
- 709 40. Ouzzani M, Hammady H, Fedorowicz Z, *et al.* Rayyan—a web and mobile app for systematic  
710 reviews. *Syst Rev* 2016;5(1):1-10. <https://doi.org/10.1186/s13643-016-0384-4>
- 711 41. Sterne JA, Savović J, Page MJ, *et al.* RoB 2: A revised tool for assessing risk of bias in  
712 randomised trials. *BMJ* 2019;366:l4898. <https://doi.org/10.1136/bmj.l4898>
- 713 42. Sterne JA, Hernán MA, Reeves BC, *et al.* ROBINS-I: A tool for assessing risk of bias in non-  
714 randomised studies of interventions. *BMJ* 2016;366:i4919.  
715 <https://doi.org/10.1136/bmj.i4919>
- 716 43. Hedges LV. Distribution Theory for Glass's Estimator of Effect Size and Related Estimators. *J*  
717 *Stat Educ* 1981;6:107-128. <https://doi.org/10.2307/1164588>
- 718 44. Daly LE. Confidence limits made easy: interval estimation using a substitution method. *Am J*  
719 *Epidemiol.* 1998;147(8):783-790. <https://doi.org/10.1093/oxfordjournals.aje.a009523>
- 720 45. Zhang J, Yu KF. What's the relative risk? A method of correcting the odds ratio in cohort  
721 studies of common outcomes. *JAMA.* 1998;280(19):1690-1691.  
722 <https://doi.org/10.1001/jama.280.19.1690>
- 723 46. Peto R, Pike MC, Armitage P, *et al.* Design and analysis of randomized clinical trials requiring  
724 prolonged observation of each patient. I. Introduction and design. *Br J Cancer.*  
725 1976;34(6):585-612. <https://doi.org/10.1038/bjc.1976.220>
- 726 47. Suurmond R, van Rhee H, Hak T. Introduction, comparison, and validation of Meta-  
727 Essentials: A free and simple tool for meta-analysis. *Res Synth Methods.* 2017;8(4):537-  
728 553. <https://doi.org/10.1002/jrsm.1260>
- 729 48. Higgins JPT, Thomas J, Chandler J, *et al.* Cochrane Handbook for Systematic Reviews of  
730 Interventions version 6.2. [online]. 2021. <https://training.cochrane.org/handbook>  
731 (accessed 30 Jan 2022).

- 732 49. Amadéo S, Rereao M, Malogne A, *et al.* Testing Brief Intervention and Phone Contact among  
733 Subjects with Suicidal Behavior: A Randomized Controlled Trial in French Polynesia in the  
734 Frames of the World Health Organization/Suicide Trends in At-Risk Territories Study. *Ment*  
735 *Illn.* 2015;7(2):5818. <https://doi.org/10.4081/mi.2015.5818>
- 736 50. Bertolote JM, Fleischmann A, De Leo D, *et al.* Repetition of suicide attempts: data from  
737 emergency care settings in five culturally different low- and middle-income countries  
738 participating in the WHO SUPRE-MISS Study. *Crisis.* 2010;31(4):194-201.  
739 <https://doi.org/10.1027/0027-5910/a000052>
- 740 51. Cebrià AI, Parra I, Pàmias M, *et al.* Effectiveness of a telephone management programme  
741 for patients discharged from an emergency department after a suicide attempt: controlled  
742 study in a Spanish population. *J Affect Disord.* 2013;147(1-3):269-276.  
743 <https://doi.org/10.1016/j.jad.2012.11.016>
- 744 52. Cebrià AI, Pérez-Bonaventura I, Cuijpers P, *et al.* Telephone Management Program for  
745 Patients Discharged From an Emergency Department After a Suicide Attempt: A 5-Year  
746 Follow-Up Study in a Spanish Population. *Crisis.* 2015;36(5):345-352.  
747 <https://doi.org/10.1027/0227-5910/a000331>
- 748 53. Cedereke M, Monti K, Ojehagen A. Telephone contact with patients in the year after a  
749 suicide attempt: does it affect treatment attendance and outcome? A randomised  
750 controlled study. *Eur Psychiatry.* 2002;17(2):82-91. [https://doi.org/10.1016/s0924-](https://doi.org/10.1016/s0924-9338(02)00632-6)  
751 [9338\(02\)00632-6](https://doi.org/10.1016/s0924-9338(02)00632-6)
- 752 54. Christensen H, Farrer L, Batterham PJ, Mackinnon A, Griffiths KM, Donker T. The effect of a  
753 web-based depression intervention on suicide ideation: secondary outcome from a  
754 randomised controlled trial in a helpline. *BMJ Open.* 2013;3(6):e002886.  
755 <https://doi.org/10.1136/bmjopen-2013-002886>
- 756 55. Comtois KA, Kerbrat AH, DeCou CR, *et al.* Effect of Augmenting Standard Care for Military  
757 Personnel With Brief Caring Text Messages for Suicide Prevention: A Randomized Clinical

- 758 Trial. *JAMA Psychiatry*. 2019;76(5):474-483.
- 759 <https://doi.org/10.1001/jamapsychiatry.2018.4530>
- 760 56. Exbrayat S, Coudrot C, Gourdon X, *et al.* Effect of telephone follow-up on repeated suicide  
761 attempt in patients discharged from an emergency psychiatry department: a controlled  
762 study. *BMC Psychiatry*. 2017;17(1):96. <https://doi.org/10.1186/s12888-017-1258-6>
- 763 57. Fleischmann A, Bertolote JM, Wasserman D, *et al.* Effectiveness of brief intervention and  
764 contact for suicide attempters: a randomized controlled trial in five countries. *Bull World*  
765 *Health Organ*. 2008;86(9):703-709. <https://doi.org/10.2471/blt.07.046995>
- 766 58. Gabilondo A, Aristegi E, Gonzalez-Pinto A, *et al.* Prevention of Suicidal Behavior with  
767 Telemedicine in Patients with a Recent Suicide Attempt: Is a 6-month Intervention Long  
768 Enough?. *Suicide Life Threat Behav*. 2020;50(1):211-219.  
769 <https://doi.org/10.1111/sltb.12576>
- 770 59. Goñi-Sarriés A, Yáñez-Goñi N, López-Goñi JJ. Psychiatric Hospitalization for Attempted  
771 Suicide and Reattempt at the One-Year Follow-Up. *Psicothema*. 2022;34(3):375-382.  
772 <https://doi.org/10.7334/psicothema2021.455>
- 773 60. Hassanzadeh M, khajeddin N, Nojomi M, Fleischmann A, Eshrati T. Brief Intervention and  
774 Contact after Deliberate Self-Harm: An Iranian Randomized Controlled Trial. *Iran J Psychiatry*  
775 *Behav Sci*. 2010;4(2):5-12.
- 776 61. López-Goñi JJ, Goñi-Sarriés A. Effectiveness of a telephone prevention programme on the  
777 recurrence of suicidal behaviour. One-year follow-up. *Psychiatry Res*. 2021;302:114029.  
778 <https://doi.org/10.1016/j.psychres.2021.114029>
- 779 62. Malakouti SK, Nojomi M, Ghanbari B, Rasouli N, Khaleghparast S, Farahani IG. Aftercare and  
780 Suicide Reattempt Prevention in Tehran, Iran. *Crisis*. 2022;43(1):18-27.  
781 <https://doi.org/10.1027/0227-5910/a000754>
- 782 63. Messiah A, Notredame CE, Demarty AL, Duhem S, Vaiva G; AlgoS investigators. Combining  
783 green cards, telephone calls and postcards into an intervention algorithm to reduce suicide

- 784        reattempt (AlgoS): P-hoc analyses of an inconclusive randomized controlled trial. *PLoS One*.  
785        2019;14(2):e0210778. <https://doi.org/10.1371/journal.pone.0210778>
- 786    64. Miller IW, Camargo CA Jr, Arias SA, *et al*. Suicide Prevention in an Emergency Department  
787        Population: The ED-SAFE Study. *JAMA Psychiatry*. 2017;74(6):563-570.  
788        <https://doi.org/10.1001/jamapsychiatry.2017.0678>
- 789    65. Mouaffak F, Marchand A, Castaigne E, Arnoux A, Hardy P. OSTA program: A French follow  
790        up intervention program for suicide prevention. *Psychiatry Res*. 2015;230(3):913-918.  
791        <https://doi.org/10.1016/j.psychres.2015.11.024>
- 792    66. Mousavi SG, Zohreh R, Maracy MR, Ebrahimi A, Sharbafchi MR. The efficacy of telephonic  
793        follow up in prevention of suicidal reattempt in patients with suicide attempt history. *Adv*  
794        *Biomed Res*. 2014;3:198. <https://doi.org/10.4103/2277-9175.142043>
- 795    67. Mousavi SG, Amini M, Mahaki B, Bagherian-Sararoudi R. Effect of phone call versus face-to-  
796        face follow-up on recurrent suicide attempts prevention in individuals with a history of  
797        multiple suicide attempts. *Adv Biomed Res*. 2016;5:184. [https://doi.org/10.4103/2277-](https://doi.org/10.4103/2277-9175.190990)  
798        [9175.190990](https://doi.org/10.4103/2277-9175.190990)
- 799    68. O'Connor RC, Smillie S, McClelland H, *et al*. SAFETEL: a pilot randomised controlled trial to  
800        assess the feasibility and acceptability of a safety planning and telephone follow-up  
801        intervention to reduce suicidal behaviour. *Pilot Feasibility Stud*. 2022;8(1):156.  
802        <https://doi.org/10.1186/s40814-022-01081-5>
- 803    69. Plancke L, Amariei A, Danel T, *et al*. Effectiveness of a French Program to Prevent Suicide  
804        Reattempt (VigilanS). *Arch Suicide Res*. 2021;25(3):570-581.  
805        <https://doi.org/10.1080/13811118.2020.1735596>
- 806    70. Riblet NB, Kenneally L, Stevens S, *et al*. A virtual, pilot randomized trial of a brief intervention  
807        to prevent suicide in an integrated healthcare setting. *Gen Hosp Psychiatry*. 2022;75:68-74.  
808        <https://doi.org/10.1016/j.genhosppsy.2022.02.002>

- 809 71. Vaiva G, Vaiva G, Ducrocq F, *et al.* Effect of telephone contact on further suicide attempts in  
810 patients discharged from an emergency department: randomised controlled study. *BMJ*.  
811 2006;332(7552):1241-1245. <https://doi.org/10.1136/bmj.332.7552.1241>
- 812 72. Vaiva G, Berrouiguet S, Walter M, *et al.* Combining Postcards, Crisis Cards, and Telephone  
813 Contact Into a Decision-Making Algorithm to Reduce Suicide Reattempt: A Randomized  
814 Clinical Trial of a Personalized Brief Contact Intervention. *J Clin Psychiatry*.  
815 2018;79(6):17m11631. <https://doi.org/10.4088/JCP.17m11631>
- 816 73. Ward-Ciesielski EF, Tidik JA, Edwards AJ, Linehan MM. Comparing brief interventions for  
817 suicidal individuals not engaged in treatment: A randomized clinical trial. *J Affect Disord*.  
818 2017;222:153-161. <https://doi.org/10.1016/j.jad.2017.07.011>
- 819 74. Wei S, Liu L, Bi B, *et al.* An intervention and follow-up study following a suicide attempt in  
820 the emergency departments of four general hospitals in Shenyang, China. *Crisis*.  
821 2013;34(2):107-115. <https://doi.org/10.1027/0227-5910/a000181>
- 822 75. Page MJ, McKenzie JE, Bossuyt PM, Boutron I, Hoffmann TC, Mulrow CD, *et al.* The PRISMA  
823 2020 statement: an updated guideline for reporting systematic reviews. *BMJ*. 2021;372:n71.  
824 <https://doi.org/10.1136/bmj.n71>
- 825 76. Andrés AM, Marzo PF. Delta: a new measure of agreement between two raters. *Br J Math*  
826 *Stat Psychol*. 2004;57:1-19. <https://doi.org/10.1348/000711004849268>
- 827 77. Cohen J. A coefficient of agreement for nominal scales. *Educ Psychol Meas*. 1960; 20: 37-46.
- 828 78. De Leo D, Scocco P, Marietta P, *et al.* Physical illness and parasuicide: evidence from the  
829 European Parasuicide Study Interview Schedule (EPSIS/WHO-EURO). *Int J Psychiatry Med*.  
830 1999;29(2):149-163. <https://doi.org/10.2190/E87K-FG03-CHEE-UJD3>
- 831 79. Beck AT, Kovacs M, Weissman A. Assessment of suicidal intention: the Scale for Suicide  
832 Ideation. *J Consult Clin Psychol*. 1979;47(2):343-352. [https://doi.org/10.1037//0022-](https://doi.org/10.1037//0022-006x.47.2.343)  
833 [006x.47.2.343](https://doi.org/10.1037//0022-006x.47.2.343)

- 834 80. Gibbons P, de Arévalo HF, Mónico M. Assessment of the factor structure and reliability of  
835 the 28-item version of the General Health Questionnaire (GHQ-28) in El Salvador. *Int. J. Clin.*  
836 *Health Psychol.* 2004;4(2):389-398.
- 837 81. Linehan M, Comtois KA. Suicide Attempt and Self-Injury Count (SASI-Count) [online]. 1996.  
838 <http://depts.washington.edu/uwbrtc/wp-content/uploads/L-SASI-Count.pdf> (accessed 28  
839 April 2024)
- 840 82. Fleischmann A, Bertolote JM, De Leo D, Wasserman D. Instruments used in SUPRE-MISS: The  
841 WHO Multisite Intervention Study on Suicidal Behaviours. In: Wasserman D, Wasserman C,  
842 eds. *Oxford Textbook of Suicidology and Suicide Prevention*. 1th ed. Oxford, OED: Oxford  
843 Textbooks; 2009. <https://doi.org/10.1093/med/9780198570059.003.0042>
- 844 83. Posner K, Brown GK, Stanley B, *et al.* The Columbia-Suicide Severity Rating Scale: initial  
845 validity and internal consistency findings from three multisite studies with adolescents and  
846 adults. *Am J Psychiatry.* 2011;168(12):1266-1277.  
847 <https://doi.org/10.1176/appi.ajp.2011.10111704>
- 848 84. Beck AT, Schuyler D, Herman I. Development of suicidal intent scales. In: Beck AT, Resnik  
849 HLP, Lettieri DJ, eds. *The prediction of suicide*. Bowie, MD: Charles Press; 1974:45–56.
- 850 85. Beck AT, Steer RA. *Beck scale for suicide ideation: Manual*. Psychological Corporation; 1993.
- 851 86. Goñi-Sarriés A, Zandio-Zorrilla M. Suicide: The Challenge of Prevention. *Anales Sis San*  
852 *Navarra.* 2017;40(3):335–8. <https://dx.doi.org/10.23938/assn.0122>
- 853 87. Hunt IM, Kapur N, Webb R, *et al.* Suicide in recently discharged psychiatric patients: a case-  
854 control study. *Psychol Med.* 2009;39(3):443-449.  
855 <https://dx.doi.org/10.1017/S0033291708003644>
- 856 88. Andersen B, Bille-Brahe U. Aftercare of suicide attempters. In: Bille-Brahe U, Schiödt H, Eds.  
857 4th European Symposium on Suicidal Behaviour. *The Odense suicide prevention project.*  
858 *Intervention and Prevention*. Odense: University Press; 1994. p. 177-84.

- 859 89. Borg S. Active intervention and comprehensive services following suicide attempts: a  
860 community-based program. In: Bille-Brahe U, Schiödt H, Eds. 4th European Symposium on  
861 Suicidal Behaviour. *The Odense suicide prevention project. Intervention and prevention*.  
862 Odense: University Press; 1994. p. 159-67.
- 863 90. Motto J, Boström AG. Post-crisis suicide preventing without therapy. *Alcohol Dis*. 1993; 5:  
864 564-7.
- 865 91. O'Brien G, Holton AR, Hurren K, Watt L, Hassanyeh F. Deliberate self-harm and predictors of  
866 out-patient attendance. *Br J Psychiatry*. 1987; 150: 246-7.
- 867 92. Corry M, Clarke M, While AE, Lalor J. Developing complex interventions for nursing: a critical  
868 review of key guidelines. *J Clin Nurs*. 2013;22(17-18):2366-86.  
869 <http://dx.doi.org/10.1111/jocn.12173>
- 870 93. Turecki G, Brent DA, Gunnell D, O'Connor RC, Oquendo MA, Pirkis J, *et al*. Suicide and suicide  
871 risk. *Nat Rev Dis Primers*. 2019;5(1). <http://dx.doi.org/10.1038/s41572-019-0121-0>
- 872 94. Serrano-Gimeno V, Diestre A, Agustin-Alcain M, Portella MJ, de Diego-Adeliño J, Tiana T,  
873 Cheddi N, Distefano A, Dominguez G, Arias M, Cardoner V, Puigdemont D, Perez V, Cardoner  
874 N. Non-fatal suicide behaviours across phases in the COVID-19 pandemic: a population-  
875 based study in a Catalan cohort. *Lancet Psychiatry*. 2024; 11(5):348-358.  
876 [http://dx.doi.org/10.1016/S2215-0366\(24\)00065-8](http://dx.doi.org/10.1016/S2215-0366(24)00065-8)
